# 1 Large-scale Genetic Characterization of a Model 2 Sulfate-Reducing Bacterium

3

4

5 Valentine V. Trotter<sup>1,7</sup>, Maxim Shatsky<sup>1</sup>, Morgan N. Price<sup>1</sup>, Thomas R. Juba<sup>2</sup>, Grant M. Zane<sup>2</sup>, Kara B. De  
6 León<sup>2,6</sup>, Erica L. Majumder<sup>2,5</sup>, Qin Gui<sup>2</sup>, Rida Ali<sup>1</sup>, Kelly M. Wetmore<sup>1</sup>, Jennifer V. Kuehl<sup>1</sup>, Adam P.  
7 Arkin<sup>1,3</sup>, Judy D. Wall<sup>2</sup>, Adam M. Deutschbauer<sup>1,4</sup>, John-Marc Chandonia<sup>1,7</sup> and Gareth P. Butland<sup>1</sup>

8

9 <sup>1</sup>Environmental Genomics and Systems Biology Division, Lawrence Berkeley National Laboratory,  
10 Berkeley, CA, USA

11 <sup>2</sup>Department of Biochemistry, University of Missouri, Columbia, MO, USA

12 <sup>3</sup>Department of Bioengineering, University of California, Berkeley, CA, USA

13 <sup>4</sup>Department of Plant and Microbial Biology, University of California, Berkeley, CA, USA

14 <sup>5</sup>Current address: Department of Bacteriology, University of Wisconsin-Madison, Madison, WI, USA

15 <sup>6</sup>Current address: Department of Microbiology and Plant Biology, University of Oklahoma, Norman, OK,  
16 USA

17 <sup>7</sup>To whom correspondence should be addressed:

18 VVT: [vvttrotter@lbl.gov](mailto:vvttrotter@lbl.gov)

19 JMC: [jmchandonia@lbl.gov](mailto:jmchandonia@lbl.gov)

20

21

22

23

24

25 **ABSTRACT**

26

27 Sulfate-reducing bacteria (SRB) are obligate anaerobes that can couple their growth to the reduction of  
28 sulfate. Despite the importance of SRB to global nutrient cycles and their damage to the petroleum industry,  
29 our molecular understanding of their physiology remains limited. To systematically provide new insights  
30 into SRB biology, we generated a randomly barcoded transposon mutant library in the model SRB  
31 *Desulfovibrio vulgaris* Hildenborough (DvH) and used this genome-wide resource to assay the importance  
32 of its genes under a range of metabolic and stress conditions. In addition to defining the essential gene set  
33 of DvH, we identified a conditional phenotype for 1,137 non-essential genes. Through examination of these  
34 conditional phenotypes, we were able to make a number of novel insights into our molecular understanding  
35 of DvH, including how this bacterium synthesizes vitamins. For example, we identified DVU0867 as an  
36 atypical L-aspartate decarboxylase required for the synthesis of pantothenic acid, provided the first  
37 experimental evidence that biotin synthesis in DvH occurs via a specialized acyl carrier protein and without  
38 methyl esters, and demonstrated that the uncharacterized dehydrogenase DVU0826:DVU0827 is necessary  
39 for the synthesis of pyridoxal phosphate. In addition, we used the mutant fitness data to identify genes  
40 involved in the assimilation of diverse nitrogen sources, and gained insights into the mechanism of  
41 inhibition of chlorate and molybdate. Our large-scale fitness dataset and RB-TnSeq mutant library are  
42 community-wide resources that can be used to generate further testable hypotheses into the gene functions  
43 of this environmentally and industrially important group of bacteria.

44

45

46

47

48

49

50

51

52

53

54

55

## 56 INTRODUCTION

57

58 Sulfate-reducing bacteria (SRB) are present in diverse anoxic environments including the deep ocean,  
59 where they are responsible for a considerable fraction of carbon mineralization (Muyzer and Stams, 2008),  
60 and in the human gut, where they produce hydrogen sulfide (Kushkevych et al., 2020). Utilization of SRB  
61 has been extensively explored for bioremediation (eg. heavy metals, radionuclides) by metabolism-  
62 dependent mechanisms and/or bioaccumulation (Joo et al., 2015; Mikheenko et al., 2008; Rückert, 2016;  
63 Yong et al., 2002). In the oil and gas industry, the activity of SRB leads to undesirable effects including  
64 souring of oil and corrosion of pipelines (Kip and van Veen, 2015; Thrasher and Vance, 2005). Given their  
65 importance, it is imperative that we develop a detailed gene-level characterization of SRB to understand  
66 and control their activities in diverse environments.

67

68 Much of our molecular understanding of SRB is derived from studies in the model *Desulfovibrio vulgaris*  
69 Hildenborough (DvH), which was the first SRB to have its genome sequenced (Heidelberg et al., 2004).  
70 DvH has an established genetic toolkit including a markerless genetic exchange system (Keller et al., 2009),  
71 conceptual and predictive models of gene regulation and signal transduction (Rajeev et al., 2011; Turkarslan  
72 et al., 2017) and mapped networks of protein-protein interactions (Shatsky et al., 2016a, 2016b). Despite  
73 these advances, there remains considerable gaps in our understanding of DvH, and, hence, SRB as a whole.

74

75 Transposon mutagenesis is a powerful genetic tool for generating a large collection of mutant strains, and  
76 the measured phenotypes of these strains can be used to infer gene functions. In SRB, an ordered transposon  
77 library has been generated and characterized in *Desulfovibrio alaskensis* G20 (Kuehl et al., 2014). This  
78 collection was subsequently used to gain new insights into the electron transfer complexes of this bacterium  
79 (Meyer et al., 2014; Price et al., 2014). In addition, the transposon insertion sequencing approach (Tn-seq),  
80 whereby the abundance of thousands of mutants are assayed simultaneously through next-generation  
81 sequencing (van Opijnen and Camilli, 2013; van Opijnen et al., 2009), has been applied in the human-  
82 associated *Desulfovibrio piger* to characterize its metabolic niche (Rey et al., 2013) and in DvH to measure  
83 phenotypes under two conditions (Fels et al., 2013). In these previous Tn-seq studies, phenotypes were not  
84 detected for most genes in the respective genomes, partly because of the limited number of conditions  
85 assayed. More recently, the random barcode transposon-site sequencing (RB-TnSeq) approach has been  
86 developed which simplifies the measurement of mutant phenotypes across many conditions (Price et al.,  
87 2018; Wetmore et al., 2015), through the use of barcode sequencing or BarSeq (Smith et al., 2009).

88

89 In this work, we report the generation of an RB-TnSeq library in DvH and its use in generating a large  
90 gene-phenotype map using the BarSeq fitness assay across 757 experiments. These experiments represent  
91 244 unique growth conditions including changes in respiratory and fermentative growth conditions, growth  
92 with different nitrogen and essential nutrient sources, and growth during exposure to various stressors.  
93 Through the investigation of this large gene-phenotype dataset in DvH, we define the essential gene set of  
94 this bacterium and derive specific new insights into its metabolism, regulation, and stress response.

95

96

97

## 98 **RESULTS**

99

### 100 **DvH essential genes in the wild-type and $\Delta upp$ backgrounds**

101 Genes with few or no transposon insertions are likely essential for viability under the growth conditions  
102 used to select the mutations. To identify the essential gene set of DvH, we first generated five transposon  
103 mutant libraries in the wild-type background on lactate-sulfate rich growth medium using a barcoded  
104 variant of the *Tn5*-RL27 transposon (henceforth called *Tn5*) (Larsen et al., 2002). Across all libraries, we  
105 generated 116 million Tn-seq reads with a *Tn5* transposon insertion that mapped to the DvH genome, with  
106 the median gene represented by 17,823 reads. We used a previously described approach that estimates  
107 essential genes based on a number of criteria including gene length, insertion density, insertions in the  
108 central portion of the gene (as insertions near the 5' and 3' ends may not disrupt the gene's function), and  
109 gene uniqueness (as we cannot discriminate insertions in highly repetitive regions) (Price et al., 2018; Rubin  
110 et al., 2015). In total, we identified 399 likely essential genes in the wild-type strain (Supplementary Table  
111 1). Of these 399 genes, 322 (81%) have reduced transposon insertion coverage in a prior DvH transposon-  
112 sequencing experiment with the same growth medium (Fels et al., 2013).

113

114 We next constructed 24 *Tn5* transposon mutant libraries in the JW710 strain background. Combined, we  
115 generated 154 million reads with a transposon and a mapped location of each in the DvH genome, with the  
116 median gene represented by 27,580 sequencing reads. JW710 contains a deletion of *upp* (DVU1025),  
117 encoding uracil phosphoribosyltransferase, a component of the pyrimidine salvage pathway. JW710 has  
118 been adopted as a commonly used base strain in which to perform counter-selection with resistance to 5-  
119 fluorouracil, a toxic pyrimidine (Keller et al., 2009). Using the same criteria applied to the wild-type  
120 transposon insertion data, we identified 436 likely essential genes in the JW710 background  
121 (Supplementary Table 1), of which 380 were in common with the wild-type background. The 380 genes  
122 that are shared between the two strains are a robust estimate of the essential gene complement of DvH and  
123 are enriched in general cellular processes such as protein synthesis and cell envelope functions (Figure 1A).  
124 To explore these genes further, we compared each to the Database of Essential Genes (DEG) (Zhang et al.,  
125 2004), which contains experimentally determined essential genes for dozens of diverse bacteria (all are  
126 non-SRB). We found that the majority of these 380 genes perform more general functions unrelated to  
127 sulfate reduction, as 271 have homologs that have been identified as essential in non-SRB. Only 109 of the  
128 DvH essential genes did not have a good homolog in DEG (Materials and Methods), and these include a

129 number of well-known genes directly involved in sulfate reduction including *dsrAB* (dissimilatory sulfite  
130 reductase) and *sat* (sulfate adenylyltransferase).

131

132 Among the 19 genes uniquely essential in the wild-type background (and not in the JW710 background),  
133 we did not find a clear biological pattern. We suspect that most of these genes are nearly essential regardless  
134 of genetic background, because 18 of the 19 are near our essentiality threshold in the JW710 data (Materials  
135 and Methods). Among the 56 genes uniquely essential in JW710, we found that the entire eight gene *de*  
136 *nov*o UMP biosynthesis pathway was essential, while all of these genes are clearly dispensable in the wild-  
137 type background. These synthetic lethality results are consistent because DvH has two pathways to make  
138 UMP, a *de novo* pathway and a salvage pathway (Supplementary Figure 1). Due to the absence of the  
139 salvage pathway in JW710 (through the  $\Delta upp$  mutation), the *de novo* pathway becomes essential. Other  
140 differences in gene essentiality between JW710 and wild-type DvH in our study, or between gene  
141 essentiality in wild-type DvH in our study or in Fels et al. (Fels et al., 2013), could be affected by sequence  
142 differences between these strains. Laboratory-acquired mutations in DvH can lead to large phenotypic  
143 differences between closely-related strains (De León et al., 2017). To identify genetic variants, we  
144 sequenced the JW710 genome and compared these data to our transposon mapping data for our wild-type  
145 strain (Materials and Methods). A list of the genetic variants in our wild-type and JW710 strains relative to  
146 the reference genome is contained in Supplementary Table 2.

147

#### 148 **A gene-phenotype map of DvH**

149 RB-TnSeq simplifies the measurement of mutant phenotypes across multiple experiments through deep  
150 sequencing of DNA barcodes that uniquely mark each strain in the library (Price et al., 2018; Wetmore et  
151 al., 2015). To facilitate the generation of a large DvH gene-phenotype map, we first constructed a RB-  
152 TnSeq mutant library in the JW710 ( $\Delta upp$ ) strain. We chose JW710 as the base strain because this  
153 background can be used for introducing a second mutation into the library, thus enabling future studies of  
154 genetic interactions in DvH. Using Tn-seq, we linked 74,923 unique DNA barcodes to transposon insertions  
155 in the main chromosome, and 4,737 unique DNA barcodes to insertions in the DvH native plasmid, pDV1.  
156 On both the chromosome and megaplasmid, *Tn5* insertions were relatively evenly distributed  
157 (Supplementary Figure 2). To perform genome-wide mutant fitness assays, we compare the abundance of  
158 DNA barcodes after growth selection (referred to as the condition sample) versus before (referred to as the  
159 Time0 sample), represented as a  $\log_2$  ratio. To calculate gene fitness scores, we use the weighted average  
160 of the individual strain fitness values for mutants in that gene (Wetmore et al., 2015). In the JW710 library,  
161 we used 15 independent insertion strains to calculate gene fitness scores for the median gene. Negative  
162 gene fitness scores mean that the mutations in this gene made mutants less fit than the average strain in the

163 library, while positive gene fitness scores indicate that the mutations in the gene were beneficial to the  
164 mutant in these growth conditions.

165

166 Using the JW710 RB-TnSeq library, we generated a large DvH gene-phenotype map by performing 757  
167 genome-wide fitness assays that passed our quality control metrics (Wetmore et al., 2015). In each of these  
168 experiments, we assayed the fitness of 2,741 protein-coding genes, for a total of 2.07 million gene-  
169 phenotype measurements. (241 non-essential proteins do not have fitness values, most often because  
170 mutants in these genes are at low abundance in the Time0 samples.) To systematically investigate the  
171 physiology of DvH, we assayed a diverse range of conditions including respiratory growth, fermentative  
172 growth, growth in the presence of different nutrients, and growth in the presence of different stressors. The  
173 complete list of experiments, with associated metadata, is available in Supplementary Table 3. These 757  
174 experiments include 244 unique experimental conditions (the remainder are biological replicates). The DvH  
175 fitness dataset can be explored interactively at the Fitness Browser ([fit.genomics.lbl.gov](http://fit.genomics.lbl.gov)), which bundles  
176 multiple computational tools to aid in the elucidation of novel gene functions. To illustrate the data, we  
177 highlight a comparison of two conditions, growth in defined media with either L-lactate or D-lactate as the  
178 sole carbon source and electron donor. As expected, many genes involved in the biosynthesis in amino  
179 acids had large fitness defects in both conditions (Figure 1B), while only a few genes had phenotypes unique  
180 to each substrate. In support of previous observations (Vita et al., 2015), our data demonstrates that  
181 DVU3032:DVU3033 encodes L-lactate dehydrogenase while DVU3027:DVU3028 encodes D-lactate  
182 dehydrogenase, as these genes have large growth defects on each substrate (Figure 1B). In addition, we  
183 found that DVU3031 is also important for growth on L-lactate. DVU3031 encodes a conserved but  
184 experimentally uncharacterized protein with AAA and DRTGG domains, and our data provides the first  
185 experimental evidence of the importance of this gene for growth on L-lactate, although its precise function  
186 remains to be determined.

187

188 Across the entire fitness dataset, we identified a significant phenotype ( $|\text{fitness}| > 0.5$  and  $|t| > 4$ , where  $t$  is  
189 a measure of the significance of the measurement (Wetmore et al., 2015)) for 1,137 genes in at least one  
190 experiment (at an estimated false discovery rate of 3%; Materials and Methods). While non-essential genes  
191 from all functional categories (main roles from TIGRFAMs (Haft et al., 2013)) had significant phenotypes,  
192 those involved in general cellular processes, amino acid biosynthesis, and transport were more likely to  
193 have a phenotype in one of our experiments, while those involved in mobile and extrachromosomal element  
194 functions, regulation, and the cell envelope were less likely to have a phenotype (Figure 1A). Among non-  
195 essential proteins with vague or hypothetical annotations, we identified a conditional phenotype for 34%.  
196 Our dataset provides a starting point for uncovering the roles for these genes.

197

198 In our prior work, we have used two primary strategies to infer gene functions from mutant phenotypes:  
199 specific phenotypes and cofitness (Price et al., 2018). A gene has a specific phenotype if it has a phenotype  
200 in only one or a handful of conditions (Materials and Methods), in contrast to genes with more pleiotropic  
201 effects. Intuitively, specific phenotypes are informative for gene function because hypotheses can be readily  
202 derived from the one or few conditions where a phenotype is observed. For example, we found that  
203 *DVU0599* (*cstA*) had a specific phenotype under conditions where pyruvate was used as the sole carbon  
204 source (Figure 1C), suggesting that this gene is involved in pyruvate utilization. *DVU0599* is distantly  
205 related to *Escherichia coli* YjiY (32% amino acid identity), which was recently demonstrated to be a  
206 pyruvate transporter (Kristoficova et al., 2018). The pyruvate-specific phenotype of *DVU0599* strongly  
207 suggests that it also encodes a pyruvate transporter. We also identified pyruvate-specific phenotypes for the  
208 nearby two component signaling system encoded by *DVU0596:DVU0597* (Figure 1C), which is consistent  
209 with the known regulation of *DVU0599* by this system (Rajeev et al., 2011). Lastly, we found a similar  
210 pyruvate-specific phenotype for *DVU2425* (*rarD*), which encodes an uncharacterized protein conserved in  
211 diverse bacteria (Figure 1C). RarD-family proteins are predicted to be transporters, and thus it is possible  
212 that *DVU2425* also transports pyruvate. However, in other bacteria with available fitness data (Price et al.,  
213 2018), RarD proteins are important for transporting various amino acids. Across the entire dataset, we  
214 identified specific phenotypes for 540 different genes. These specific phenotypes are spread across a wide  
215 range of different experimental conditions, suggesting that they are useful for understanding different  
216 aspects of DvH biology.

217

218 Genes that have high cofitness ( $r$ , correlated patterns of phenotypes across all experiments) are likely to  
219 share a cellular function (Deutschbauer et al., 2011; Price et al., 2018). For example, the phosphotransferase  
220 system (PTS) proteins PtsI (*DVU0829*) and *DVU1632* (a putative EII-A enzyme) are highly cofit ( $r = 0.89$ ),  
221 with both genes sharing fitness defects in a number of experiments with alternative nitrogen sources (Figure  
222 1D). In the entire DvH dataset, we identified 2,104 gene pairs that have high cofitness ( $r \geq 0.8$ ), with 330  
223 different genes having at least one cofitness relationship. In the subsequent sections, we combine the  
224 specific phenotypes and cofitness relationships with comparative genomics to derive new insights into the  
225 functions of poorly understood DvH genes.

226

### 227 ***DVU0867* encodes an atypical L-aspartate decarboxylase**

228 To identify genes that are required for vitamin biosynthesis, we tested growth in minimal medium with  
229 vitamins omitted. (Our defined medium usually contained Thauer's vitamins.) To stimulate growth and  
230 hence vitamin requirements, we added vitamin-free casamino acids (a mixture of amino acids) to the media



231 for many of these experiments. We will describe novel findings in the biosynthesis of pantothenic acid  
232 (vitamin B<sub>5</sub>), biotin (vitamin B<sub>7</sub>), and pyridoxal phosphate (vitamin B<sub>6</sub>).

233

234 First, as shown in Figure 2A, we identified three genes that were specifically important when pantothenic  
235 acid was not available. Two of these genes (*DVU2446* and *DVU2448*) were already annotated as being  
236 involved in pantothenic acid biosynthesis (*panB* and *panC*, respectively). The remaining gene, *DVU0867*,  
237 was annotated as aromatic amino acid decarboxylase. *DVU0867* is distantly related (27% amino acid  
238 identity) to the aspartate decarboxylase (PanP) of *Vibrio fischeri* (Pan *et al.*, 2017). Aspartate decarboxylase  
239 is expected to be required for synthesis of pantothenic acid (Figure 2B). *E. coli* and many other bacteria  
240 encode *panD* for this step, but neither *panD* nor its maturation cofactor *panZ* are present in DvH genome.  
241 So, we hypothesized that *DVU0867* encodes an aspartate decarboxylase.

242

243 To test if *DVU0867* could decarboxylate L-aspartate, we attempted to complement mutants of *E. coli* that  
244 require pantothenic acid for growth. The expression of *DVU0867* restored growth of the *panD* mutant in  
245 the absence of pantothenic acid (Figure 2C), but did not restore growth of *panC* or *panB* mutants (data not  
246 shown). This confirmed that the protein encoded by *DVU0867* performs the same function as PanD, L-  
247 aspartate decarboxylase.

248

#### 249 **Biotin synthesis with a specialized acyl carrier protein and without methyl esters**

250 Biotin, commonly known as vitamin B<sub>7</sub>, is an essential enzyme cofactor required by all three domains of  
251 life. However, it remains unclear how DvH synthesizes biotin, as it does not contain clear homologs for the  
252 entirety of known biosynthetic pathways. Because biotin is only required in trace amounts, we added the  
253 protein avidin (0.1 U/mL), which has a high affinity for biotin and sequesters it, to our no-biotin  
254 experiments. We identified ten genes that were specifically important for growth in the absence of biotin  
255 (Figure 3A). Nine of these ten genes were clustered together (*DVU2558:DVU2565*). This cluster includes  
256 *bioF*, *bioA*, *bioD*, and *bioB*, which together convert pimeloyl-[ACP] to biotin. (ACP is short for acyl carrier  
257 protein.) These genes bracket a cluster of genes encoding homologs to known fatty acid biosynthesis  
258 factors: *DVU2560* and *DORF42491* have FabZ-like domains, *DVU2561* is a putative 3-oxoacyl-ACP  
259 reductase, *DVU2562* is homologous to acyl-carrier protein, and *DVU2563* contains a beta-keto-acyl carrier  
260 protein synthase (KAS) domain and is annotated as a FabF protein. These genes have previously been  
261 suggested to play a role as an alternate pathway for the synthesis of pimeloyl-ACP from malonyl-CoA,  
262 which is the first stage of *de novo* biotin synthesis (Lin and Cronan, 2011; Rodionov *et al.*, 2004). The  
263 phenotype observed in our fitness assays are the first experimental evidence supporting their role in  
264 synthesizing biotin. Another gene in the primary biotin synthesis cluster, *birA* (*DVU2557*) encoding a

265 transcriptional repressor and biotin-protein ligase, did not have a strong phenotype in our no-biotin  
266 experiments. This is possibly due to the presence of another putative biotin-protein ligase (DVU1835) in  
267 the genome.

268  
269 The single gene outside of this gene cluster whose mutant displayed a specific fitness defect in the absence  
270 of biotin was *DVU1220*, which is annotated as a nitroreductase. DVU1220 is predicted to contain both  
271 flavin mononucleotide (FMN) and [4Fe4S] iron sulfur cluster cofactors. We monitored the growth of the  
272 parental strain, JW710, alongside *DVU1220* and *DVU2558* (*bioB*) mutants in media with and without biotin  
273 depletion (Figure 3B). Both *DVU1220* and *DVU2558* mutants displayed significant growth defects under  
274 biotin depletion conditions, which confirms a role for *DVU1220* in biotin synthesis.

275  
276 The existence of an extended biotin gene cluster was previously reported to be limited to the genus  
277 *Desulfovibrio* (Rodionov et al., 2004); (Lin and Cronan, 2011). More genome sequences are now available  
278 and we found similar gene clusters in two other orders of Deltaproteobacteria and in *Desulfurispirillum*  
279 *indicum* from the phylum Chrysiogenetes (Figure 3C, Supplementary Figure 3). Furthermore, in the  
280 genomes of *Syntrophobacter fumaroxidans* MPOB and *Desulfobacter vibrioformis* DSM 8776 for instance,  
281 these gene clusters include a nitroreductase-like gene (Figure 3C, Supplementary Figure 3). The  
282 nitroreductases in these biotin clusters are similar to each other (over 40% pairwise identity) but are  
283 distantly related to DVU1220; nevertheless, their clustering with the other genes of the pathway is  
284 consistent with the involvement of a nitroreductase-like protein in biotin synthesis in these organisms.

285  
286 Although our data show that the entire biotin synthesis cluster as well as *DVU1220* are required for biotin  
287 synthesis in DvH, further study will be needed to define the biochemical pathway for the first stage of biotin  
288 synthesis, up to pimeloyl-ACP. It appears that *DVU2562* encodes an alternate ACP that is specialized for  
289 this pathway. (The other ACP in the genome, *DVU1205*, is essential, presumably because it is required for  
290 fatty acid biosynthesis.) In contrast to *E. coli*, where the enzymes for fatty acid biosynthesis convert  
291 malonyl-ACP methyl ester to pimeloyl-ACP methyl ester, it appears that DvH uses specialized enzymes to  
292 elongate malonyl-ACP to pimeloyl-ACP, without methyl ester intermediates. Indeed, neither the gene for  
293 forming the methyl ester (*bioC*) nor the gene for removing it (*bioH*) are found in DvH. The elongation of  
294 malonyl-ACP to pimeloyl-ACP would require a  $\beta$ -keto-ACP synthase, a 3-oxo-ACP reductase, a  $\beta$ -  
295 hydroxyacyl-ACP dehydratase, and an enoyl-ACP reductase. The cluster contains candidates for all of these  
296 activities except for enoyl-ACP reductase, which might be provided by the nitroreductase-like protein or  
297 by a promiscuous enzyme from fatty acid biosynthesis (such as DVU2064, which is essential).

298

## 299 **The putative dehydrogenase DVU0826:DVU0827 is required for vitamin B<sub>6</sub> synthesis**

300 By growing the mutant pool in defined medium that lacks pyridoxal phosphate (vitamin B<sub>6</sub>), we identified  
301 a putative two-subunit dehydrogenase (DVU0826 and DVU0827) that is required for pyridoxal phosphate  
302 biosynthesis (Figure 4A). The genes for both subunits have nearly identical fitness patterns (high cofitness)  
303 as *pdxA* (DVU2241), which encodes 4-hydroxythreonine-4-phosphate dehydrogenase. Besides *pdxA* and  
304 the dehydrogenase, the DvH genome also encodes pyridoxine 5'-phosphate synthase (*pdxJ*, DVU1908),  
305 which implies that DvH synthesizes pyridoxal phosphate via deoxyxylulose 5'-phosphate, as in *E. coli*  
306 (Figure 4B) (Mittenhuber 2001; Fitzpatrick et al., 2007). The orthologs of DVU0826:DVU0827 in *D.*  
307 *vulgaris* Miyazaki F (DvMF\_2874:DvMF\_2875) display their highest co-fitness values ( $r = 0.78$  and  $0.87$ ,  
308 respectively) with PdxJ (DvMF\_0281) (data from Price et al 2018). This evidence supports a role for the  
309 dehydrogenase in pyridoxal phosphate biosynthesis.

310  
311 As shown in Figure 4B, the DvH genome seems to be missing genes for two dehydrogenase enzymes in  
312 pyridoxal phosphate biosynthesis: 4-phosphoerythronate dehydrogenase (PdxB in *E. coli*) and pyridoxine  
313 5'-phosphate oxidase (PdxH in *E. coli*). DVU0921 encodes a pyridoxamine 5'-phosphate oxidase domain  
314 (PF12900), but this putative protein is very distantly related to PdxH, and insertions in DVU0921 exhibited  
315 little phenotype in any of our assays (all  $|\text{fitness}| < 1$ ), so we do not think it encodes the missing PdxH.  
316 *PdxH* is essential for the growth of most bacteria in media that contain yeast extract (data of Price et al  
317 2018) because PdxH is required to convert pyridoxine to pyridoxal phosphate. Since DVU0826:DVU0827  
318 are not essential, we suspect that they encode a novel 4-phosphoerythronate dehydrogenase.

319

## 320 **Utilization of nitrogen sources**

321 DvH is capable of fixing nitrogen gas (Heidelberg et al., 2004; Riederer-Henderson and Wilson, 1970) but  
322 its capacity to use other nitrogen sources in the presence of pDV1-encoding nitrogenase has not been  
323 reported. As far as we know, DvH does not use amino acids as the sole source of carbon for growth. We  
324 assayed gene fitness for DvH in defined lactate-sulfate media with 28 different nitrogen sources, including  
325 with N<sub>2</sub> only. As expected, mutations in the *nifD* and *nifK* genes, encoding the alpha and beta subunits of  
326 the nitrogenase complex respectively, were highly detrimental to growth when N<sub>2</sub> was the sole nitrogen  
327 source available, but had little effect on growth in ammonium (Figure 5). All of the genes in the nitrogen  
328 fixation cluster (DVUA0007:DVUA0016) were important for growth with no added nitrogen, except for  
329 DVUA0010, which had no fitness data. (After averaging across six replicate experiments with N<sub>2</sub> as the  
330 nitrogen source, each other gene in the cluster had fitness  $< -2$ .)

331 We used the fitness of the nitrogenase genes *nifDK* to identify additional conditions under which nitrogen  
332 fixation contributed to growth. We considered the nitrogen sources we tested as well-utilized if *nifDK* did  
333 not contribute to fitness, and as weakly utilized if *nifDK* had a milder phenotype. Based on the fitness data  
334 of *nifDK*, we found that among the amino acids glutamine and asparagine were well-utilized, and that  
335 serine, tryptophan, and phenylalanine were weakly utilized (Figure 5). In addition, we found that growth in  
336 minimal medium with no ammonium was stimulated by the addition of glutamine, asparagine, serine, or  
337 phenylalanine (data not shown), which further confirms that these amino acids are utilized as nitrogen  
338 sources by DvH. No growth after five days was observed when histidine, aspartate, or tyrosine were  
339 provided as alternatives to ammonium. Growth occurred in the presence of the remaining 11 amino acids,  
340 but appears to depend entirely on nitrogen fixation (Figure 5), which suggests that they are not utilized by  
341 DvH as nitrogen sources. We did find that the addition of valine, isoleucine, leucine, or glutamate slightly  
342 reduced the initial lag phase when DvH was grown in minimal medium with no ammonium (Supplementary  
343 Figure 4). Nevertheless, because nitrogen fixation genes were important in these conditions, and because  
344 we did not identify potential catabolic genes or transporters that were important for utilizing these four  
345 amino acids, we believe that they are not utilized. The stimulation of growth could be due to effects on gene  
346 regulation or due the uptake of small amounts of amino acids.

347 The strong fitness defect of mutants in the asparaginase encoded by *DVU2242*, when asparagine was used  
348 as sole nitrogen source (Figure 5), shows that this enzyme can efficiently provide ammonium. We did not  
349 identify any enzymes that were specifically important during growth on glutamine, so the origin of the  
350 glutaminase activity remains unclear. We did identify a putative transporter of the NbcE family (TC  
351 2.A.115, (Saier et al., 2016)) that was specifically important for growth on glutamine (*DVU2773*), so we  
352 propose that *DVU2773* encodes the glutamine transporter. The putative serine dehydratase (*DVU2147*) and  
353 tryptophanase (*DVU2204*) were important for growth on serine and tryptophan, respectively (Figure 5),  
354 which confirms their participation in providing ammonium from these amino acids. We are not sure why  
355 both nitrogenase and a deaminating enzyme were important for growth with serine or tryptophan. It is  
356 possible that uptake is slow, that the deaminating enzymes are weakly expressed, or that nitrogen fixation  
357 and deamination are important during different phases of growth. We did not identify any genes that were  
358 specifically important for utilizing phenylalanine.

359 In addition to amino acids, we tested the utilization of polyamine, nucleobases, urea, nitrite, and formamide.  
360 In the presence of nitrite or formamide, nitrogen fixation was not required (Figure 5), which shows that  
361 DvH can utilize these nitrogen sources as well. As expected, nitrite utilization required the nitrite reductase  
362 NrfA (*DVU0625*; Figure 5). Although the DvH genome contains a gene annotated as a formamidase  
363 (*DVU1164*), we did not identify any phenotypes for this gene (all  $|\text{fitness}| < 0.5$ ). Overall, we found that

364 DvH can utilize nine nitrogen sources (ammonia, N<sub>2</sub>, five of the amino acids, nitrite, and formamide), and  
365 we identified genes involved in the utilization of most of these nitrogen sources.

### 366 **Chlorate toxicity is mediated via the aldehyde oxidoreductase (Aor)**

367 The use of chlorate has been proposed as an additive to control the growth of SRB and concomitant sulfide  
368 production, which causes oil souring and is a major industrial problem (Engelbrektson et al., 2014; Gregoire  
369 et al., 2014). Previous work indicated that (per)chlorate can serve as specific and potent inhibitors of sulfate  
370 respiration (Carlson et al., 2015). It has been shown that both perchlorate and chlorate act, in part, as direct  
371 competitive inhibitors of sulfate adenylyltransferase, the first step in the pathway (Carlson et al., 2015;  
372 Mehta-Kolte et al., 2019; Stoeva and Coates, 2019). Alternatively, reduction of (per)chlorate and their  
373 conversion into reactive chlorine species (RCS) (chlorite and hypochlorite) has been attributed to the  
374 adventitious reactivity of metal-binding pterin dependent enzymes such as nitrate reductase, which has a  
375 molybdenum cofactor.

376 Although the DvH genome does not contain a predicted (per)chlorate reductase or nitrate reductase, the  
377 growth of DvH JW710 was significantly reduced when cultured in the presence of 10 mM chlorate and was  
378 almost completely inhibited upon addition of 20 mM chlorate (Figure 6A). Fitness profiling the  
379 chemogenomic response of JW710 to 6.25 mM chlorate identified 15 genes that were detrimental to fitness  
380 (gave a positive fitness value when disrupted) in this condition but had little effect on fitness in the absence  
381 of chlorate (Figure 6A). Seven of these genes are involved in the biosynthesis of molybdenum cofactor or  
382 tungsten cofactor. (These are *moaA* (DVU0580), *moaC* (DVU0289), *moaE* (DVU2212), *moeA* (DVU2990),  
383 *moeA-2* (DVU0951), *moeB* (DVU0643), and *mogA* (DVU0971)). Another four genes are involved in the  
384 uptake of tungstate (*tupABC* or DVU0747:DVU0745) or its regulation (*tupR* or DVU3193; (Rajeev et al.,  
385 2018)). The gene with the largest effect on fitness was *aor* (DVU1179), encoding a putative tungsten-  
386 dependent aldehyde:ferredoxin oxidoreductase.

387 It appears that biosynthesis of the tungsten cofactor is detrimental to the parental strain in the presence of  
388 chlorate because it allows for the activity of Aor. Furthermore, this effect does not occur with other  
389 oxyanions of chlorine: mutants in *aor* and the other tungsten-related genes were about as sensitive as other  
390 mutants in the presence of perchlorate or chlorite. (Fitness values for all twelve of those genes when  
391 challenged with 6.25-12.5 mM perchlorate or 0.1-0.25 mM chlorite were between -1 and +1 across all  
392 three replicates of each condition.) To quantify the advantage of disrupting *aor* or tungsten cofactor  
393 biosynthesis genes during growth on chlorate, we compared the growth of mutant strains for *aor*, *moeA*,  
394 and *moeA-2* to the library parental strain JW710 in presence of up to 20 mM chlorate. All strains grew  
395 similarly in the absence of chlorate (Figure 6B); JW710 was inhibited by 10 mM chlorate (Figure 6C); and

396 the interruption of *aor* or of the tungsten cofactor biosynthesis genes conferred resistance to 20 mM chlorate  
397 (Figure 6D).

398 Based on these data, we propose that Aor catalyzes the reduction of chlorate to chlorite, which is far more  
399 toxic. Thus, disruption of *aor* itself, or of various genes involved in the acquisition of tungstate or the  
400 biosynthesis of tungsten cofactor, will confer resistance to chlorate. To test if this mechanism of chlorate  
401 toxicity applies to other sulfate-reducing bacteria, we examined previously-published fitness data for *D.*  
402 *vulgaris* Miyazaki F and *D. alaskensis* G20 growing in lactate-sulfate medium in the presence of chlorate.  
403 In *D. vulgaris* Miyazaki F, the three most detrimental genes during growth in 6.25 mM chlorate were all  
404 involved in molybdenum or tungsten cofactor biosynthesis (fitness > +6.0, data of (Price et al., 2018)). The  
405 ortholog of *aor* (*DvMF\_1956*) showed strongly positive fitness (fitness = +5.6) and two other  
406 molybdopterin-containing enzymes predicted to be anaerobic dehydrogenases (*DvMF\_1484* and  
407 *DvMF\_0448*) had milder positive fitness values (fitness = +2 and +1.5 respectively). This suggests that  
408 several enzymes contribute to the reduction of chlorate in *D. vulgaris* Miyazaki F. In *D. alaskensis* G20,  
409 the six genes providing functions that were most detrimental to growth in the presence of chlorate are all  
410 involved in molybdenum or tungsten cofactor biosynthesis (data of (Carlson et al., 2015)). Thus, in other  
411 sulfate-reducing bacteria, the activity of molybdopterin-dependent enzymes is involved in chlorate toxicity.

412 Our data also allow the inference that both *moeA* and *moeA-2* are required for the formation of the tungsten  
413 cofactor of *aor*. Furthermore, the two genes have high cofitness across all of our experiments ( $r = 0.85$ ).  
414 Their orthologs in *D. vulgaris* Miyazaki F (*DvMF\_1797* and *DvMF\_1358*) also have high cofitness ( $r =$   
415  $0.90$ ). The two *moeA*-like proteins of DvH are distantly related (33% identity) and DVU0951 (annotated as  
416 MoeA) has an additional C-terminal domain (PF12727) from the periplasmic binding protein superfamily.  
417 It is not understood why many bacterial genomes contain two *moeA*-like genes, unlike *E. coli*, which has a  
418 single *moeA*. Some researchers have speculated that the two copies might be specialized for the insertion  
419 of molybdate or tungstate (i.e., (Smart et al., 2009)), but this is not the case in *Desulfovibrio*, nor are the  
420 two *moeA* genes functionally redundant since the inactivation of each resulted in resistance to chlorate.

421 The remaining three genes that are detrimental during growth of JW710 in 6.25 mM chlorate form a putative  
422 three-component signaling system that includes a Lon-type protease, a histidine kinase, and a DNA-binding  
423 response regulator (DVU3303:DVU3305). The three genes have very similar fitness patterns (all pairwise  
424 cofitness > 0.9), which confirms that they function together. One of the regulatory targets of this system is  
425 the putative anion transporter encoded by *DVU3299* (Rajeev et al., 2011). *DVU3299* is important for growth  
426 in chlorate stress (average fitness = -2.3 across three replicates), so the phenotype of the signaling system  
427 may be due to its effect on the expression of *DVU3299*.

428 **The response to molybdate toxicity**



429

430 Molybdate ( $\text{MoO}_4^{2-}$ ) is highly toxic to SRB due to its capacity to act as a futile substrate for the adenosine  
431 phosphosulfate (APS) reductase, a key enzyme in the sulfate reduction pathway (Peck, 1962). We examined  
432 the response of the JW710 mutant pool when challenged with 100  $\mu\text{M}$   $\text{Na}_2\text{MoO}_4$  under lactate-sulfate,  
433 pyruvate-sulfate and pyruvate-sulfite growth conditions using BarSeq. A total of 40 genes were found to  
434 respond specifically to the presence of molybdate. Here we will highlight two gene clusters that were not  
435 previously linked to molybdate and which exhibited among the strongest responses: *DVU0436:DVU0438*  
436 and *DVU0539:DVU0545* (Figure 7A).

437 First, mutations in *DVU0436*, encoding a TetR-type transcriptional regulator, displayed a fitness advantage  
438 for the mutants in the presence of molybdate (Figure 7A). In contrast, strains lacking *DVU0437* or  
439 *DVU0438*, which are annotated as the membrane fusion protein (MFP) and the integral membrane subunits  
440 of a resistance-nodulation-division (RND) type efflux pump, had significant fitness defects in the presence  
441 of molybdate (Figure 7A). These data suggest that *DVU0436* represses transcription of the RND-type efflux  
442 pump encoded by *DVU0437:DVU0438*. Indeed, the RegPrecise database predicts that *DVU0436* regulates  
443 the operon *DVU0436:DVU0438* via a site just upstream of *DVU0436* (Novichkov et al., 2013).

444 RND efflux pumps have a third outer membrane component, but no candidates for the missing component  
445 were found near *DVU0437:DVU0438*. Instead, based on cofitness, we identified *DVU3097* as the probable  
446 outer membrane component. *DVU3097* shares the molybdate-related phenotypes of *DVU0437:DVU0438*  
447 but also has other phenotypes (Figure 7B). The other phenotypes suggest that *DVU3097* encodes the outer  
448 membrane component of other efflux systems as well. The orthologous efflux system in *D. vulgaris*  
449 Miyazaki F (*DvMF\_1516:DvMF\_1515/DvMF\_2365*) is specifically important for growth in the presence  
450 of the antibiotic carbenicillin (data of (Price et al., 2018)). In both strains of *Desulfovibrio*, the efflux system  
451 is probably involved in maintaining cell wall integrity rather than in the efflux of molybdate or a related  
452 compound.

453 The second molybdate-responsive cluster, *DVU0539:DVU0545*, is comprised of two divergently  
454 transcribed operons, *DVU0540:DVU0539* and *DVU0542:DVU0545*. (There is no *DVU0541* gene.)  
455 *DVU0540:DVU0539* encode a sensor histidine kinase and a DNA-binding response regulator, respectively.  
456 *DVU0539* is thought to regulate both operons, and when cloned into *E. coli*, *DVU0539* can activate  
457 transcription from *DVU0542*'s promoter (Rajeev et al., 2011). *DVU0542:DVU0545* encode two proteins  
458 with homology to universal stress proteins (*DVU0542*, *DVU0545*), a transporter from the putative sulfate  
459 exporter (PSE) family (*DVU0543*; TC 2.A.98; (Saier et al., 2016), and a 133-amino acid protein with a  
460 transmembrane helix (*DVU0544*). The histidine kinase (*DVU0540*) and one of the universal stress proteins  
461 (*DVU0542*) were important for growth in the presence of molybdate, while the other genes in the cluster

462 were detrimental during growth in the presence of molybdate, resulting in a positive fitness value when  
463 disrupted (Figure 7A). The only exception was the response regulator (DVU0539) had no phenotype during  
464 molybdate stress in lactate-sulfate medium (Figure 7A). Based on these data, it appears that the histidine  
465 kinase DVU0540 opposes the activity of the response regulator DVU0539. Nevertheless, the roles of  
466 *DVU0542:DVU0545* in responding to molybdate remain unclear and will require further investigation.

467

## 468 CONCLUSION

469

470 Despite the importance of SRB to many environmental and industrial processes, we still have a limited  
471 molecular genetic understanding of these bacteria relative to well-studied species such as *E. coli*. To  
472 increase our knowledge of SRB biology, we applied a high-throughput genetics driven approach, RB-  
473 TnSeq, to systematically identify mutant phenotypes for the commonly studied SRB *D. vulgaris*  
474 Hildenborough. From these phenotypes and comparative genomic analyses, we were able to make a number  
475 of new insights into the physiology and metabolism of DvH.

476

477 The large-scale genetic dataset we present for DvH can serve as a powerful tool for developing hypotheses  
478 regarding the functions of genes in this bacterium. Importantly, our dataset complements other resources  
479 available for this strain including gene regulatory and metabolic models. The DvH RB-TnSeq library in  
480 JW710 is readily available for other groups to perform additional genome-wide assays; furthermore the  
481 availability of archived single mutants (both targeted gene deletions and transposon insertion strains) can  
482 greatly accelerate follow-up studies on genes of interest.

483

484

## 485 MATERIALS AND METHODS

486

### 487 Bacterial strains and materials

488 The bacterial strains and oligonucleotides used in this study are listed in Supplementary Tables 4 and 5,  
489 respectively. Oligonucleotides for cloning were ordered from Life Technologies ([www.thermofisher.com](http://www.thermofisher.com))  
490 and oligonucleotides for next-generation sequencing libraries preparation were ordered from Integrated  
491 DNA Technologies ([www.IDT.com](http://www.IDT.com)). We used the GoTaq® Green Master Mix (Promega) for colony PCRs;  
492 and Q5 hot start DNA polymerase (New England Biolabs) for all other PCR reactions. DNA fragments  
493 were purified with the QIAquick PCR purification or Gel extraction kit (Qiagen). T4 DNA ligase and buffer  
494 were purchased from NEB. Plasmid and genomic DNA isolations were carried out with the QIAprep Spin  
495 Miniprep Kit and the DNeasy Blood & Tissue Kit (Qiagen), respectively.



496

497 The DvH genome annotation used in this study includes protein-coding genes that are not in the current  
498 version in GenBank (GCF\_000195755.1). These additional genes were identified by transcriptomics and  
499 proteomics evidence (Price et al., 2011), and each starts with the systematic name “DORF”. These  
500 annotations are included in the DvH information at MicrobesOnline (Dehal et al., 2010).

501

502 The genes neighborhood comparison shown in this study was achieved using the BioCyc Database  
503 collection and the Ensembl Bacteria browser (Howe et al., 2020; Karp et al., 2019).

504

### 505 **Growth conditions**

506 *E. coli* conjugation strain APA766 was cultured in Luria-Bertani (LB) medium at 37°C supplemented with  
507 100 µg/ml kanamycin and diaminopimelic acid (DAP) added to a final concentration of 300 µM. *D. vulgaris*  
508 Hildenborough strains were grown within an anaerobic chamber (Coy Laboratory Products, Grass Lake,  
509 MI) with an atmosphere of about 2% H<sub>2</sub>, 5% CO<sub>2</sub>, and 93% N<sub>2</sub>. DvH was grown in MO medium (Zane et  
510 al., 2010). When 60mM lactate (carbon source), 30mM sulfate (electron acceptor) and yeast extract (1  
511 g/liter) were added, the medium was designated MOYLS4 medium. A description of the media used in this  
512 study and their composition is given in Supplementary Table 6. Other carbon sources and electron acceptors  
513 were used and their concentrations are detailed in Supplementary Table 3. All media were autoclaved,  
514 moved to the anaerobic chamber before cooling and amended with sodium sulfide (1mM) as reductant prior  
515 to inoculation. MOYLS4 agar plates were poured inside the anaerobic chamber 1 - 2 days prior to use.  
516 Culture growth was measured with a Bioscreen C instrument (Growth Curves USA) housed within the  
517 anaerobic chamber at 30°C.

518

### 519 **Transposon mutant library construction**

520 We constructed *Tn5* transposon mutant libraries in the wild-type and JW710 backgrounds with minor  
521 modifications to those previously described protocols (Wetmore et al., 2015). Our *Tn5* transposon was a  
522 barcoded derivative of the *Tn5*-RL27 transposon (Larsen et al., 2002), which is itself a derivative of the  
523 *Tn5* transposon (Reznikoff, 2008). Briefly, we conjugated mid-log-phase grown *E. coli* APA766 and DvH  
524 cells at 2:1 ratio on a 0.45 µM nylon membrane filter (Supor) overlaid on MOYLS4 agar plates. After 4  
525 hours of anaerobic incubation (30°C), the filters were transferred into liquid MOYLS4 medium. After 4  
526 hours of recovery at 30°C, the cells were then transferred into the same medium supplemented with G418  
527 (400 µg/mL), and grown to saturation to select for G418-resistant transposon mutants. We made multiple,  
528 single-use glycerol stocks of the library and extracted genomic DNA for Tn-seq analysis. To map the

529 genomic location of the transposon insertions and to link these insertions to their associated DNA barcode,  
530 we used the same Tn-seq protocol that was previously described (Wetmore et al., 2015).

531

### 532 **Identification of essential genes**

533 Genes that are essential (or nearly so) for viability under the conditions used to select the mutants were  
534 identified with previously described criteria (Price et al., 2018; Rubin et al., 2015). Only protein-coding  
535 genes with at least 100 nucleotides of non-repetitive sequence (so that transposon insertions could be  
536 unambiguously mapped) were considered. A gene was deemed essential if the normalized density of  
537 insertions (dens, scaled so that the median is 1) and normalized reads per kilobase (normreads, scaled so  
538 that the median is 1 and also normalized for GC content) were both below 0.2 (see Supplementary Table  
539 1), and if the mutants in that gene did not have sufficient abundance in Time0 samples to calculate fitness  
540 scores. As the wild-type strain was not used for fitness assays, we used the Time0 samples from the JW710  
541 mutant library for this parameter in the wild-type essentiality calls. Of the 19 genes called as essential in  
542 the wild-type background but not in JW710, 18 were considered “nearly essential” because either dens or  
543 normreads were below 0.2 (Supplementary Table 1). From the Fels *et al.* TnSeq data (Fels et al., 2013), we  
544 determined the number of different positions with a central insertion (10 - 90% of gene length; we ignored  
545 insertion positions with only 1 read) and the total number of sequencing reads for each gene at these  
546 positions (Supplementary Table 1). Genes with 10 or more insertion positions and 100 or more total reads  
547 were considered to be dispensable for viability. To compare the 380 genes that were identified as likely  
548 essential in both the wild-type and JW710 backgrounds to essential genes in other bacteria, we used the  
549 Database of Essential Genes (Zhang et al., 2004), which contains lists of essential genes from dozens of  
550 bacteria. Specifically, we downloaded the latest version of DEG (version 15.2) and used BLASTp to search  
551 for homologs of the DvH proteins. We considered the DvH protein to have a homolog if percent identity  
552 to the DEG protein was at least 30%, and if the alignment covered at least 75% of the protein’s length in  
553 both the DvH and DEG proteins.

554

### 555 **Sequence differences between wild-type DvH and JW710**

556 The genome of JW710 was sequenced on an Illumina MiSeq by the University of Missouri DNA Core.  
557 Within the Geneious software (v 8.1.9) and with default parameters, raw sequences from JW710 were  
558 trimmed to remove adapter sequences, mapped to the DvH genome reference sequence (NCBI Accession  
559 No. NC\_002937.3 and NC\_005863.1) with Bowtie2 (Langmead and Salzberg, 2012), and sequence  
560 variants were identified. To identify sequence variants in the wild-type DvH strain used in this study, we  
561 aligned the Tn-seq reads from the wild-type background (after removing the sequences corresponding to

562 the transposon) against the published reference genome, and identified sequence variants as described  
563 above for JW710. This analysis covered about 75% of the genome.

564

### 565 **Genome-wide mutant fitness assays**

566 We performed pooled mutant fitness assays as described previously (Price et al., 2018; Wetmore et al.,  
567 2015). Briefly, an aliquot of the full transposon mutant library was inoculated in MOYLS4 medium  
568 supplemented with G418 (400 ug/mL) and culture was left to grow anaerobically at 30°C until the cells  
569 reached mid-log phase. Samples of the culture of pooled mutants were collected as the “Time0” controls.  
570 The remaining culture was pelleted, washed twice with phosphate buffer, and finally resuspended in  
571 phosphate buffer (or in MOLS4 when formate-acetate was used as only carbon source). We inoculated the  
572 mutant pool in the selective medium at a starting optical density at 600 nm of 0.02. The fitness assays were  
573 grown in either 24-well microplates or in 15 mL tubes; all plates and tubes were equilibrated inside the  
574 anaerobic chamber prior use. After 4 to 6 population doublings of the mutant library, we collected  
575 “condition” samples. We then extracted genomic DNA from the Time0 and condition samples. The DNA  
576 barcodes were amplified and sequenced (BarSeq) with previously established protocols (Price et al., 2018;  
577 Wetmore et al., 2015).

578

### 579 **Data analysis**

580 We calculated gene fitness scores as described (Wetmore et al., 2015). Briefly, strain fitness scores are  
581 calculated as the normalized log<sub>2</sub> ratio of the abundance of the barcode after selection (condition) versus  
582 before (Time0). Gene fitness is computed as the weighted average of the fitness of the individual mutants;  
583 then, to correct for variation in copy number along the chromosome in growing cells, gene fitness values  
584 are normalized so that the running median along the main chromosome is zero; finally, the gene fitness  
585 values are normalized so that the mode (for genes on the chromosome) is zero. For each gene fitness score,  
586 we calculate a *t*-like test statistic to determine the significance of the measurement (Wetmore et al., 2015).  
587 For calculating the number of DvH genes with a significant phenotype in the entire dataset, we required  
588  $|\text{fitness}| > 0.5$  and  $|t| > 4$ . This analysis identified 1,137 genes with a phenotype in at least one of the 757  
589 experiments. To determine the false discovery rate (FDR), we used comparisons among the Time0 samples,  
590 which are not expected to result in significant phenotypes. Among 83 Time0 comparisons, we identified 4  
591 genes with a significant phenotype with the same thresholds for fitness and *t*. After correcting for having  
592 757 condition experiments and only 83 Time0 samples, we estimated the FDR for genes with a significant  
593 phenotype as 3% (36/1,137).

594

595 DvH genes with a specific phenotype in an experiment were defined as:  $|fitness| > 1$  and  $|t| > 5$ ;  $|fitness| <$   
596  $1$  in at least 95% of experiments; and the fitness value in this experiment was more pronounced than most  
597 of its other fitness values ( $|fitness| > 95\text{th percentile}(|fitness|) + 0.5$ ) (Price et al., 2018). Cofitness was  
598 calculated as the Pearson correlation coefficient between all 757 fitness measurements for each pair of  
599 genes (Price et al., 2018).

600

601 To infer the functions of DvH genes based on mutant phenotypes, we primarily used the fitness browser  
602 ([fit.genomics.lbl.gov](http://fit.genomics.lbl.gov)), which contains genome-wide mutant fitness data for 38 different bacteria and a  
603 number of interactive tools for data exploration (Price et al., 2018). To determine the current state of  
604 knowledge on individual DvH proteins and their homologs, we used PaperBLAST  
605 (<http://papers.genomics.lbl.gov/>) (Price and Arkin, 2017). We used TIGRFAMs to assign DvH proteins to  
606 different functional categories (primarily using main role categories) (Haft et al., 2013). RegPrecise  
607 (Novichkov et al., 2013) was accessed using MicrobesOnline or from github  
608 (<https://github.com/SMRUCC/RegPrecise/tree/master/genomes>).

609

610 To identify protein-coding genes with hypothetical or vague annotations, we matched their descriptions  
611 against text patterns such as “hypothetical”, “family”, or “membrane protein,” as described previously  
612 (Price et al., 2018).

613

614

### 615 **Data and software availability**

616 The data and analyses described in this work can be accessed from different sources. First, the gene fitness  
617 values and their comparison to fitness data from other bacteria are available through the fitness browser  
618 ([fit.genomics.lbl.gov](http://fit.genomics.lbl.gov), archived at <https://doi.org/10.6084/m9.figshare.13172087.v1>). This is the best  
619 location to access the data to examine the phenotypes of specific genes of interest or to BLAST a protein  
620 of interest against the entire dataset. Second, the gene fitness values,  $t$  scores, detailed metadata for all  
621 experiments, barcode counts, tables of genes with specific phenotypes and cofitness, and a single R image  
622 with all analyzed fitness data, are available at figshare (<https://doi.org/10.6084/m9.figshare.13010285>).  
623 Third, all of the TnSeq data is available from NCBI’s sequence read archive under project PRJNA666215.  
624 Fourth, genome sequencing data for strain JW710 is available at accession SRX9297596.

625

626 The software we used for analyzing the Tn-seq and BarSeq fitness data is available at  
627 <https://bitbucket.org/berkeleylab/feba/>.

628

629 **FIGURES**

630

631

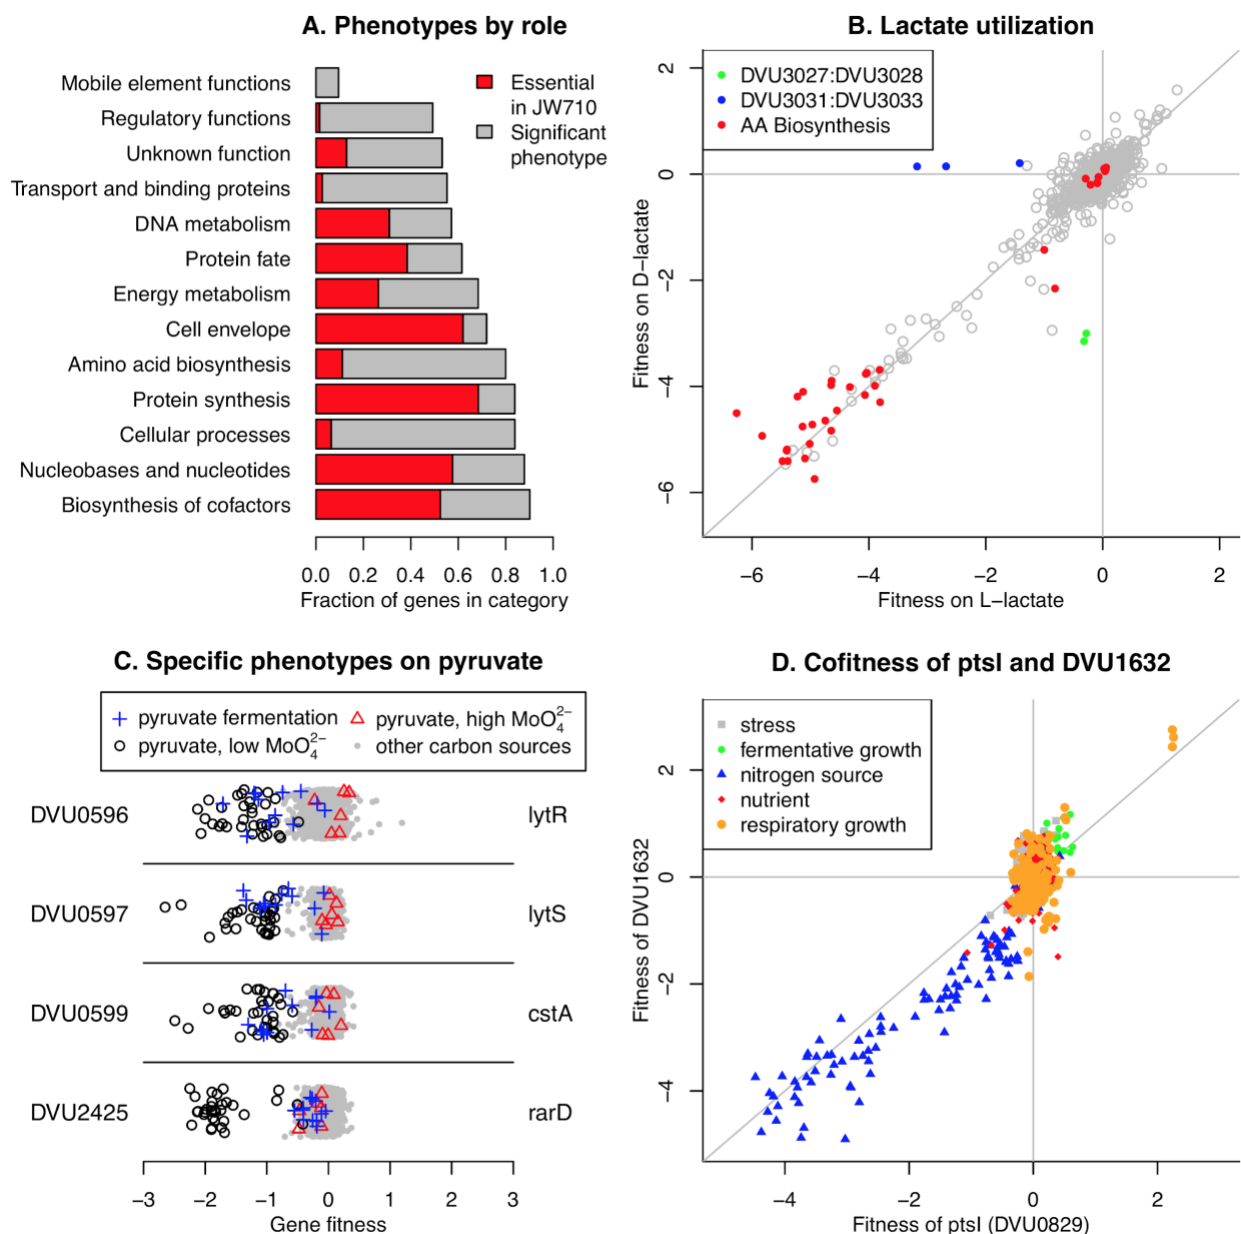

632

633

634 **Figure 1.** Summary of *D. vulgaris* Hildenborough mutant fitness dataset. (A) Fraction of genes from  
635 different functional categories that were essential (in both wild-type and JW710 backgrounds) or had a  
636 significant phenotype in at least one experiment. The functional categories are from TIGRFAMs roles (Haft  
637 et al., 2013). Only categories with 20 or more genes are shown. (B) Comparison of gene fitness values for  
638 growth in minimal media with either L-lactate (*x*-axis) or D-lactate (*y*-axis) as the carbon source. The data

639 is the average of three biological replicates for each condition. “AA biosynthesis genes” are genes with  
 640 TIGRFAMs role of “Amino acid biosynthesis.” (C) Specific phenotypes for genes important for growth on  
 641 pyruvate. In these plots, each point represents the fitness of that gene in one of 757 genome-wide assays.  
 642 Certain experiment classes are highlighted. The y-axis is random. (D) Comparison of fitness values for  
 643 *DVU0829* (x-axis) and *DVUI632* (y-axis) across all 757 experiments. In panels B and D, lines show  $x = 0$ ,  
 644  $y = 0$ , and  $x = y$ .  
 645

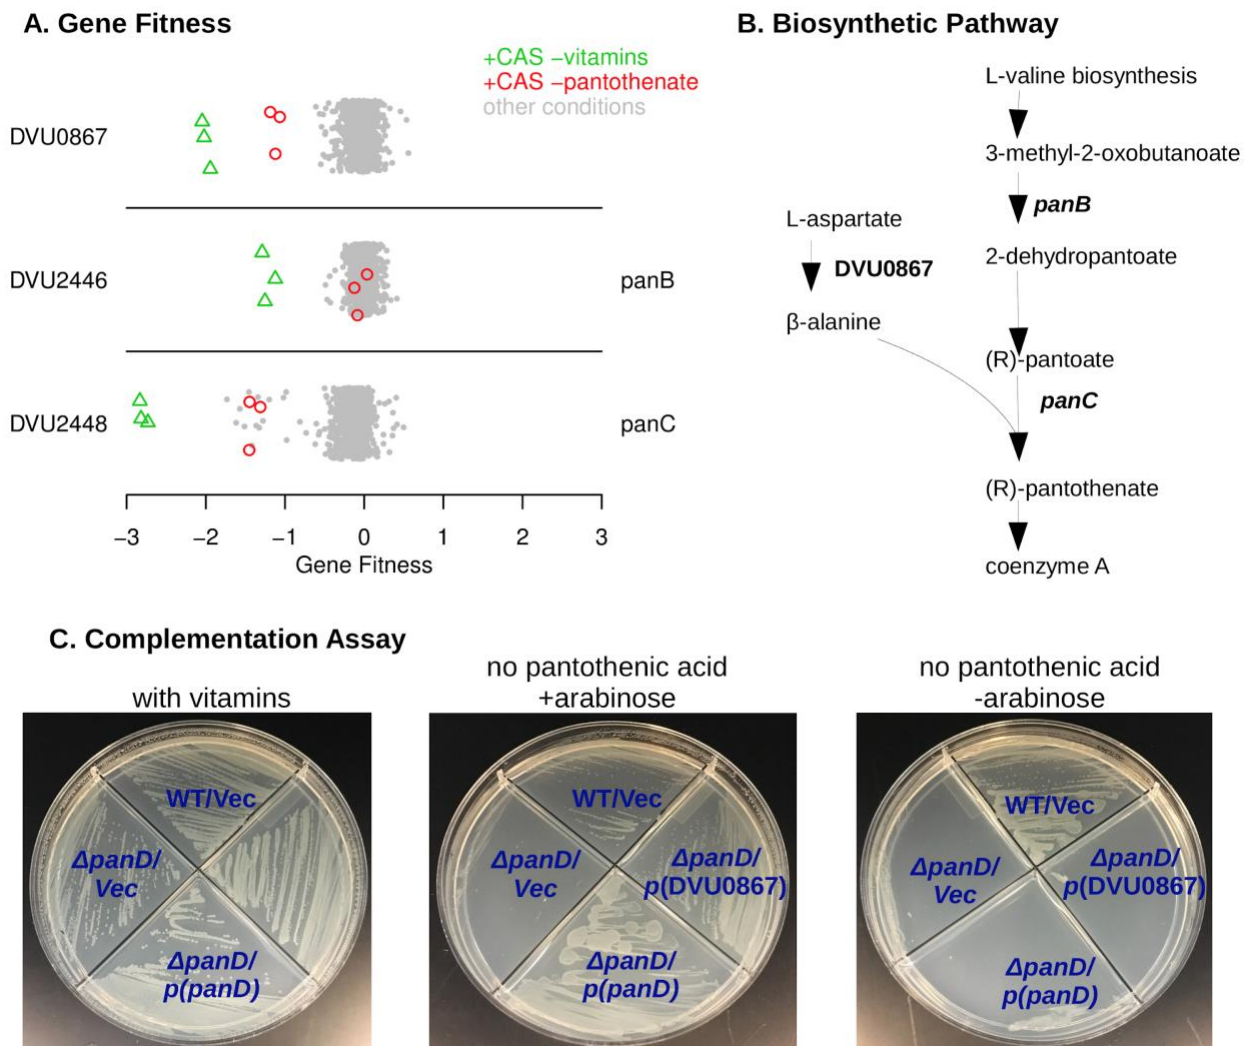

646  
 647  
 648 **Figure 2.** DVU0867 has L-aspartate 1-decarboxylase activity. (A) Fitness data for each gene across all 757  
 649 experiments, with pantothenate-related conditions highlighted. The y-axis is random and CAS is short for  
 650 casamino acids. (B) The biosynthetic pathway for pantothenate, with key enzymes highlighted. (C)



651 Complementation assays using an *E. coli panD* gene knockout strain that is defective in pantothenate  
 652 biosynthesis and lacks aspartate 1-decarboxylase activity. Indicated genes were cloned upstream of an  
 653 arabinose inducible promoter. Vec is an empty vector control.  
 654

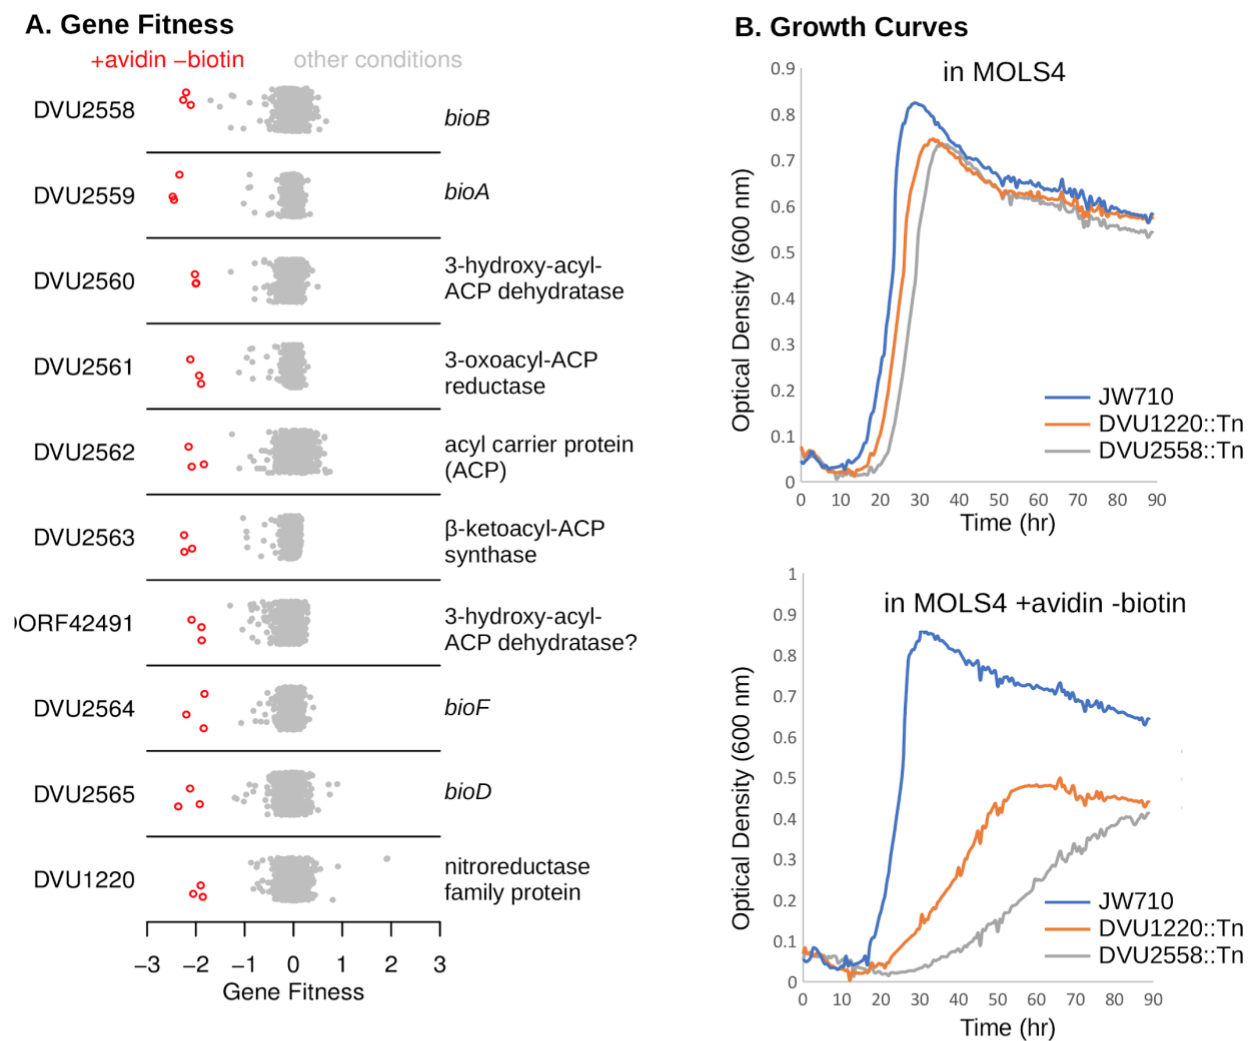

**C. Gene Neighborhoods**

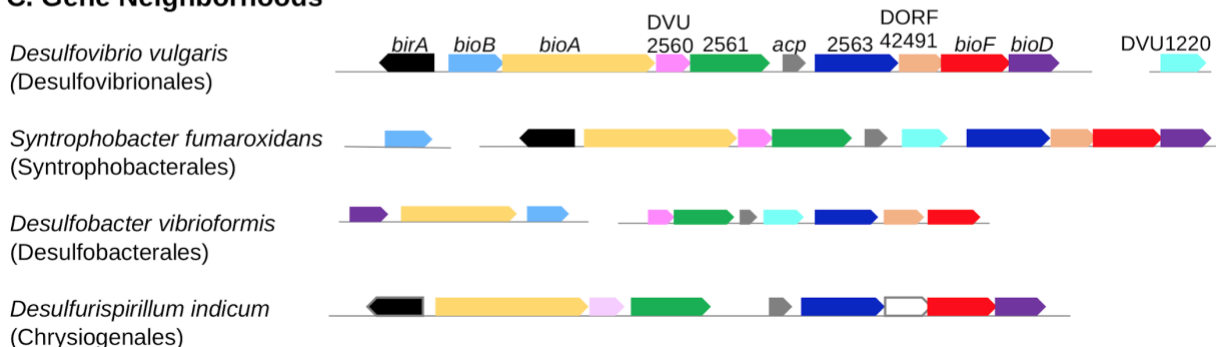

655  
 656

657 **Figure 3.** An atypical biotin synthesis pathway in *D. vulgaris* Hildenborough. (A) Fitness data for each  
658 gene across all 757 experiments, with experiments in the absence of biotin and supplemented with avidin  
659 highlighted. The y-axis is random. (B) Growth assays of the DvH JW710 control strain, and strains with  
660 mutations in either *DVU1220* or *DVU2558* (*bioB*). Measurements were made in a Bioscreen C growth  
661 analysis system and each curve is the average of four replicates. (C) Gene neighborhood and conservation  
662 in other microorganisms with components of the DvH biotin synthesis pathway. Genes are colored by their  
663 homology to the corresponding DvH genes, and *birA* is only shown if it is adjacent to other biotin synthesis  
664 genes.  
665



### A. Gene Fitness

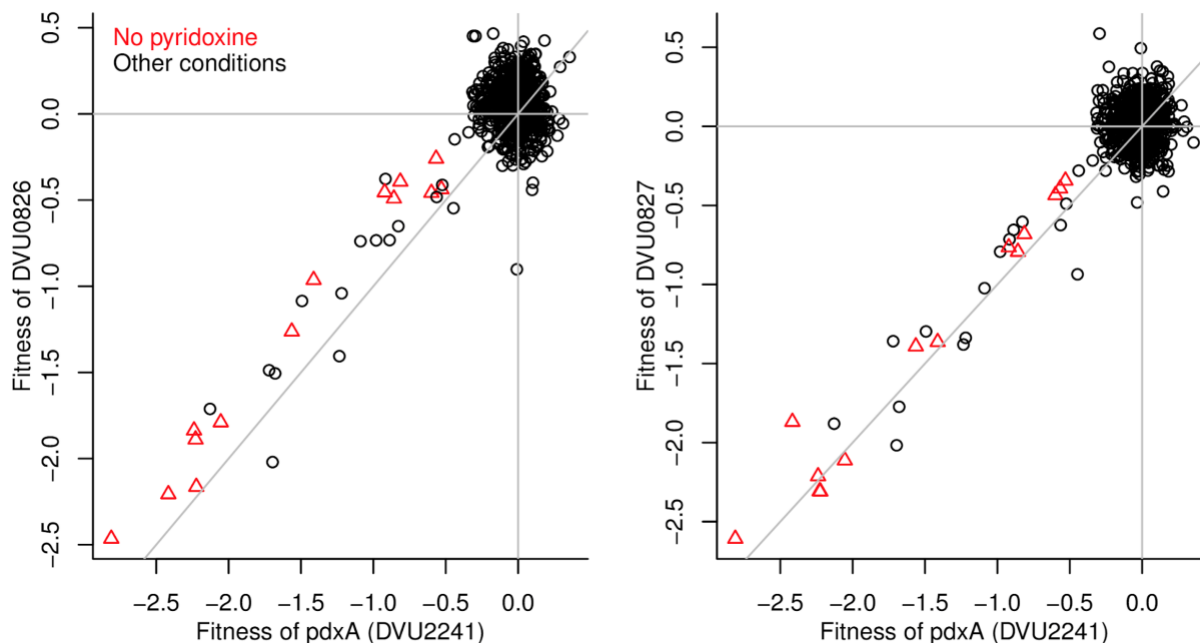

### B. Pathway

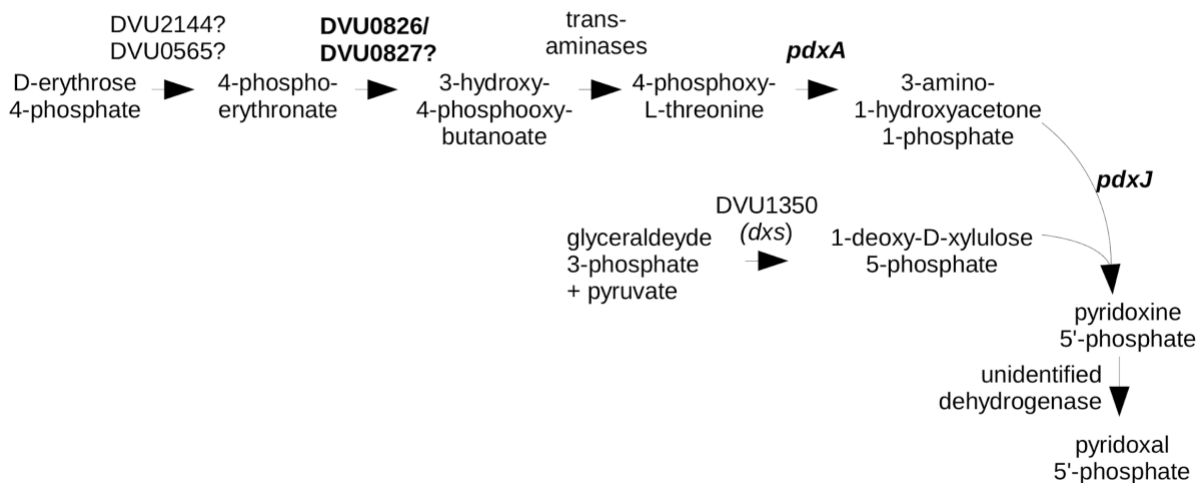

666

667

668 **Figure 4.** *DVU0826* and *DVU0827* are required for vitamin B<sub>6</sub> synthesis. (A) Comparison of gene fitness  
 669 values across 757 experiments between *pdxA* (*DVU2241*) and either *DVU0826* (left) or *DVU0827* (right).  
 670 Experiments performed in the absence of pyridoxine are highlighted. *pdxA* has high cofitness with both  
 671 *DVU0826* ( $r = 0.81$ ) and *DVU0827* ( $r = 0.84$ ). (B) The proposed pathway of pyridoxal phosphate  
 672 biosynthesis in DvH.

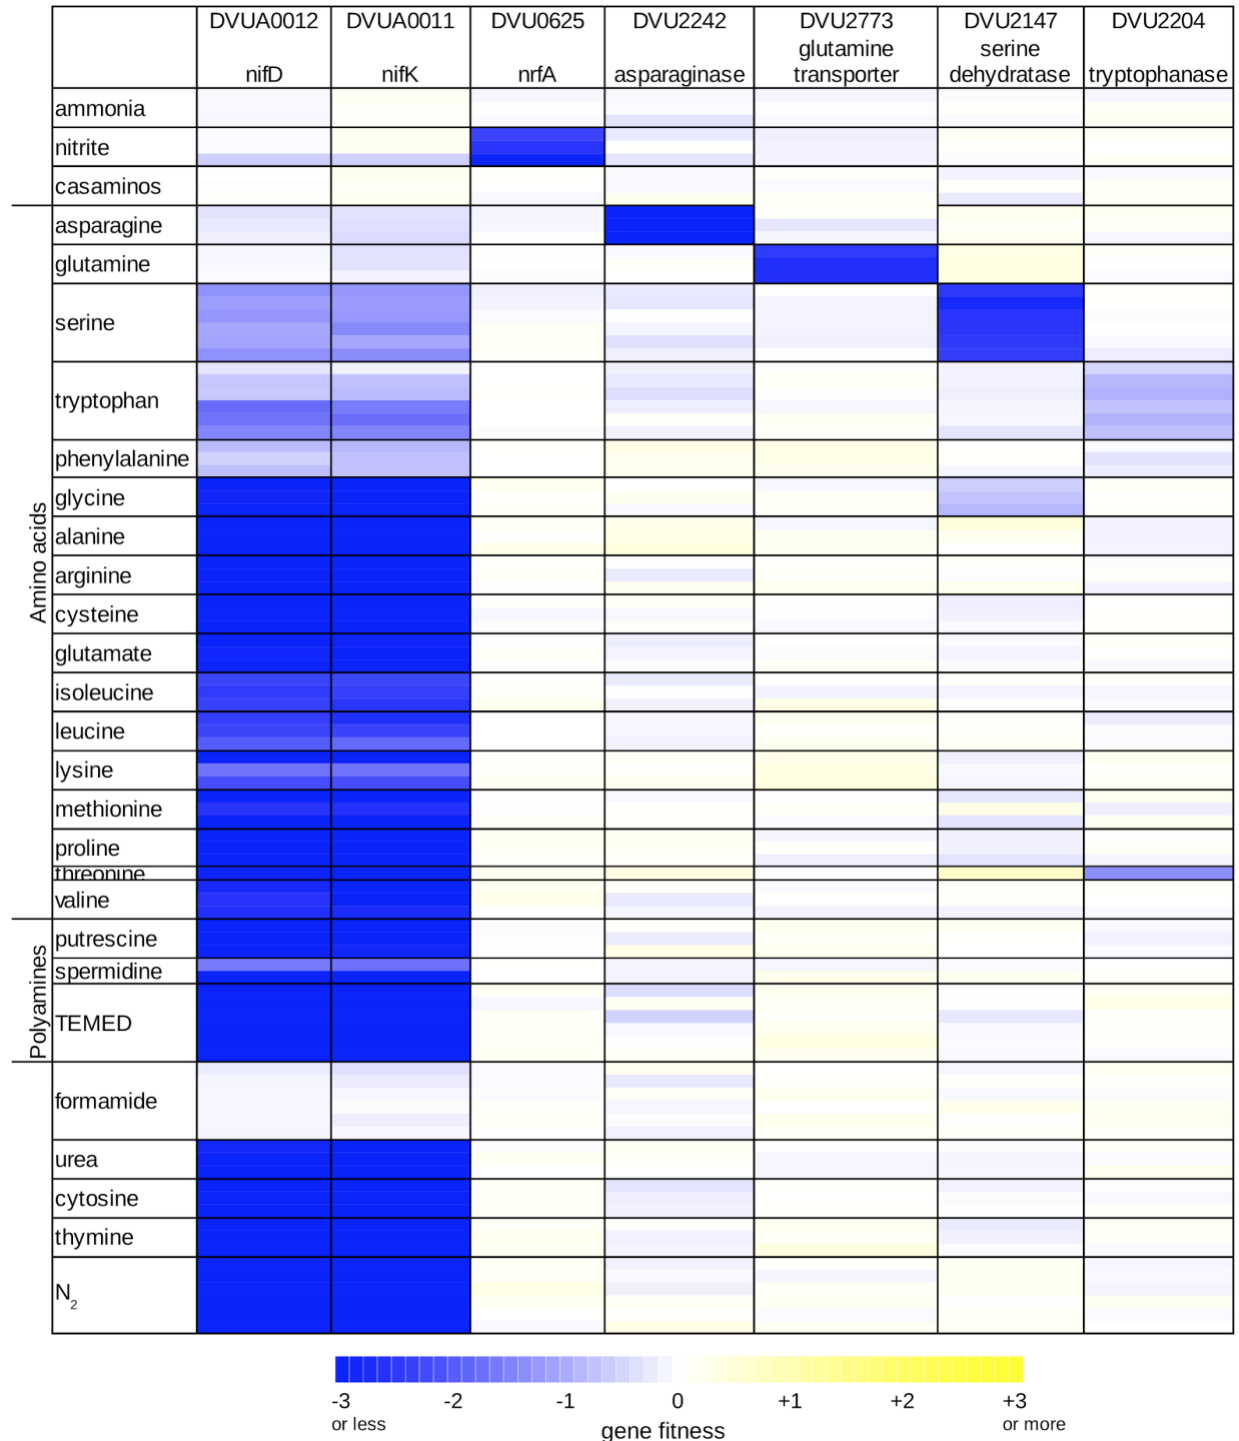

673

674

675 **Figure 5.** Overview of nitrogen utilization in *D. vulgaris* Hildenborough. Heatmap of gene fitness data for  
 676 select genes in experiments where the nitrogen source was varied. For each condition, we show the data  
 677 from each replicate experiment separately. TEMED is tetramethylethylenediamine; casaminos is casamino  
 678 acids.

679

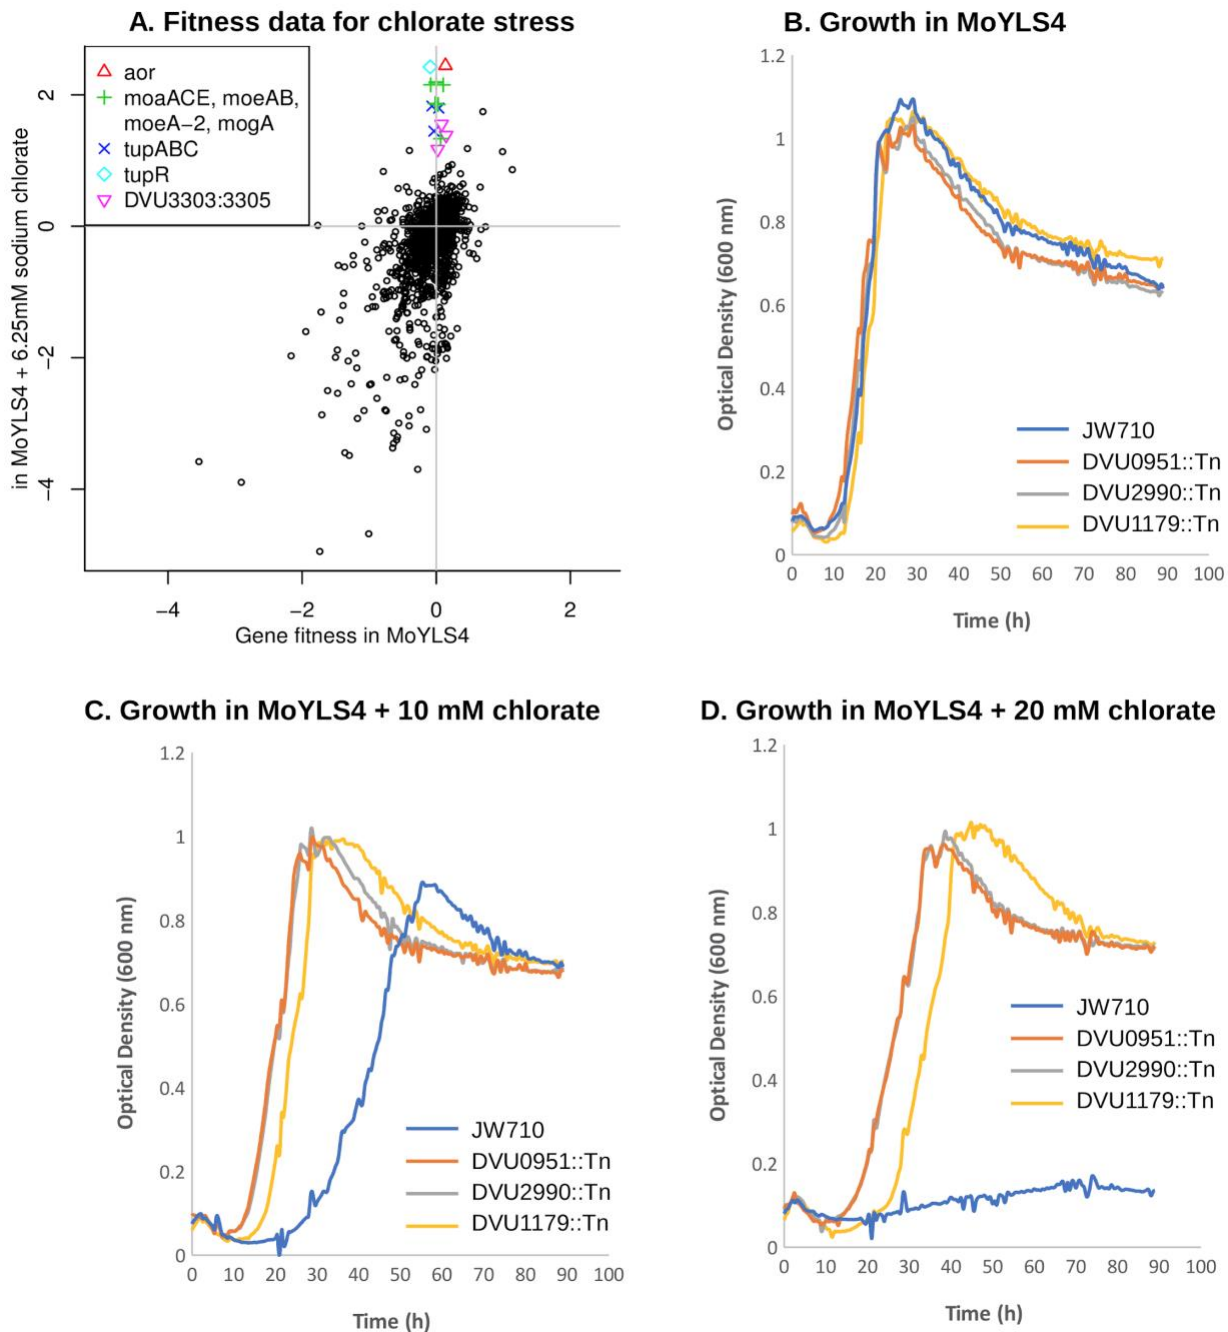

680

681

682 **Figure 6.** Loss of aldehyde oxidoreductase activity results in chlorate resistance. (A) Comparison of gene  
683 fitness values for growth in rich lactate-sulfate media or in media supplemented with 6.25 mM sodium  
684 chlorate. Each value is the average from three replicate experiments. (B-D) Growth of DvH JW710 and  
685 mutant strains of DVU0951 (*moeA*), DVU2990 (*moeA-2*) and DVU1179 (*aor*) in rich media with increasing  
686 concentrations of sodium chlorate. Each curve is the average of four replicates.

687

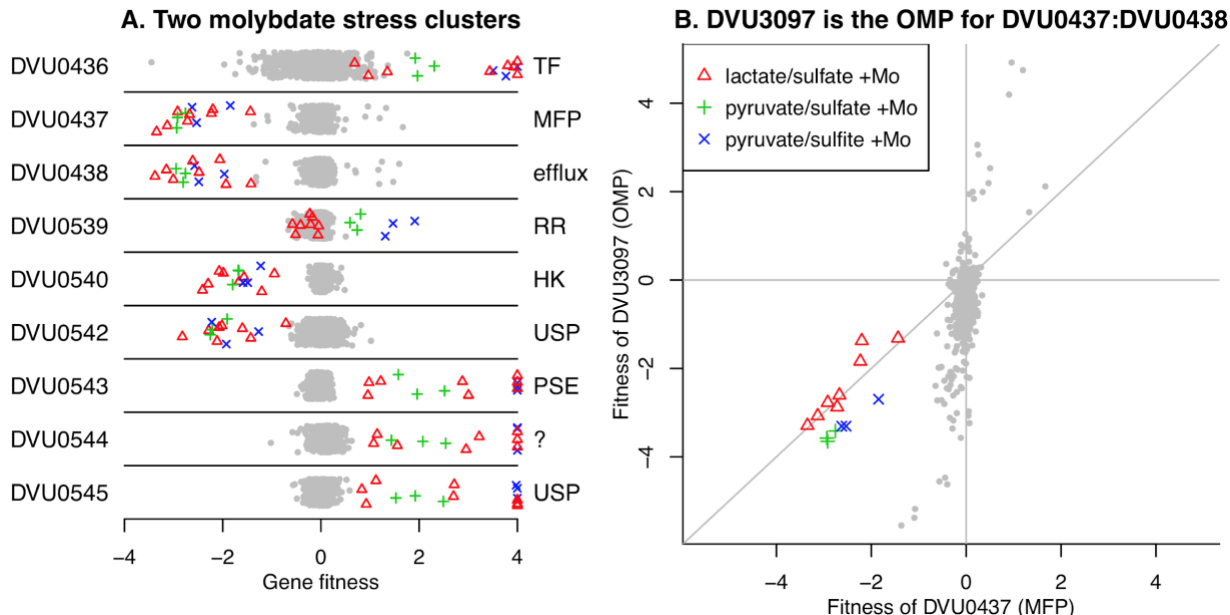

688

689

690 **Figure 7.** Selected genes with specific phenotypes during molybdate stress. (A) Two clusters of genes  
691 involved in molybdate stress. Each point represents the fitness of that gene in a genome-wide assay (x-axis).  
692 Values above +4 are shown at +4. The y-axis is random. (B) Comparison of fitness patterns for the  
693 membrane fusion protein DVU0437 and the outer membrane protein DVU3097. In both panels,  
694 experiments with added molybdate (0.1 mM) are highlighted with the same color coding (see panel B  
695 legend). 4 of the 8 experiments with lactate/sulfate media and added molybdate also had tungstate added  
696 (at 0.5 or 2.0 mM).

697

## 698 FUNDING SOURCES

699

700 This material by ENIGMA- Ecosystems and Networks Integrated with Genes and Molecular Assemblies  
701 (<http://enigma.lbl.gov>), a Science Focus Area Program at Lawrence Berkeley National Laboratory is based  
702 upon work supported by the U.S. Department of Energy, Office of Science, Office of Biological &  
703 Environmental Research under contract number DE-AC02-05CH11231. The funders had no role in study  
704 design, data collection and interpretation, or the decision to submit the work for publication. The United  
705 States Government retains and the publisher, by accepting the article for publication, acknowledges that the  
706 United States Government retains a non-exclusive, paid-up, irrevocable, world-wide license to publish or

707 reproduce the published form of this manuscript, or allow others to do so, for United States Government  
708 purposes.

709 This work used the Vincent J. Coates Genomics Sequencing Laboratory at UC Berkeley, supported by NIH  
710 S10 OD018174 Instrumentation Grant.

711

712

713

## 714 **ACKNOWLEDGEMENTS**

715

716 We thank Lara Rajeev for her help with anaerobic growth monitoring and Hans K. Carlson for helpful  
717 discussions and critical reading of the manuscript.

718

719

## 720 **REFERENCES**

721

722 Carlson, H.K., Kuehl, J.V., Hazra, A.B., Justice, N.B., Stoeva, M.K., Sczesnak, A., Mullan, M.R., Iavarone,  
723 A.T., Engelbrektson, A., Price, M.N., et al. (2015). Mechanisms of direct inhibition of the respiratory  
724 sulfate-reduction pathway by (per)chlorate and nitrate. *ISME J.* 9, 1295–1305.

725 De León, K.B., Zane, G.M., Trotter, V.V., Krantz, G.P., Arkin, A.P., Butland, G.P., Walian, P.J., Fields,  
726 M.W., and Wall, J.D. (2017). Unintended Laboratory-Driven Evolution Reveals Genetic Requirements for  
727 Biofilm Formation by *Desulfovibrio vulgaris* Hildenborough. *MBio* 8.

728 Dehal, P.S., Joachimiak, M.P., Price, M.N., Bates, J.T., Baumohl, J.K., Chivian, D., Friedland, G.D.,  
729 Huang, K.H., Keller, K., Novichkov, P.S., et al. (2010). MicrobesOnline: an integrated portal for  
730 comparative and functional genomics. *Nucleic Acids Res.* 38, D396-400.

731 Deutschbauer, A., Price, M.N., Wetmore, K.M., Shao, W., Baumohl, J.K., Xu, Z., Nguyen, M., Tamse, R.,  
732 Davis, R.W., and Arkin, A.P. (2011). Evidence-based annotation of gene function in *Shewanella oneidensis*  
733 MR-1 using genome-wide fitness profiling across 121 conditions. *PLoS Genet.* 7, e1002385.

734 Engelbrektson, A., Hubbard, C.G., Tom, L.M., Boussina, A., Jin, Y.T., Wong, H., Piceno, Y.M., Carlson,  
735 H.K., Conrad, M.E., Anderson, G., et al. (2014). Inhibition of microbial sulfate reduction in a flow-through  
736 column system by (per)chlorate treatment. *Front. Microbiol.* 5, 315.

737 Fels, S.R., Zane, G.M., Blake, S.M., and Wall, J.D. (2013). Rapid transposon liquid enrichment sequencing

- 738 (TnLE-seq) for gene fitness evaluation in underdeveloped bacterial systems. *Appl. Environ. Microbiol.* *79*,  
739 7510–7517.
- 740 Gregoire, P., Engelbrekton, A., Hubbard, C.G., Metlagel, Z., Csencsits, R., Auer, M., Conrad, M.E.,  
741 Thieme, J., Northrup, P., and Coates, J.D. (2014). Control of sulfidogenesis through bio-oxidation of H<sub>2</sub>S  
742 coupled to (per)chlorate reduction. *Environ. Microbiol. Rep.* *6*, 558–564.
- 743 Haft, D.H., Selengut, J.D., Richter, R.A., Harkins, D., Basu, M.K., and Beck, E. (2013). Tigrfams and  
744 genome properties in 2013. *Nucleic Acids Res.* *41*, D387-95.
- 745 Heidelberg, J.F., Seshadri, R., Haveman, S.A., Hemme, C.L., Paulsen, I.T., Kolonay, J.F., Eisen, J.A.,  
746 Ward, N., Methe, B., Brinkac, L.M., et al. (2004). The genome sequence of the anaerobic, sulfate-reducing  
747 bacterium *Desulfovibrio vulgaris* Hildenborough. *Nat. Biotechnol.* *22*, 554–559.
- 748 Howe, K.L., Contreras-Moreira, B., De Silva, N., Maslen, G., Akanni, W., Allen, J., Alvarez-Jarreta, J.,  
749 Barba, M., Bolser, D.M., Cambell, L., et al. (2020). Ensembl Genomes 2020-enabling non-vertebrate  
750 genomic research. *Nucleic Acids Res.* *48*, D689–D695.
- 751 Joo, J. ock, Choi, J.-H., Kim, I.H., Kim, Y.-K., and Oh, B.-K. (2015). Effective bioremediation of Cadmium  
752 (II), nickel (II), and chromium (VI) in a marine environment by using *Desulfovibrio desulfuricans*.  
753 *Biotechnol. Bioprocess Eng.* *20*, 937–941.
- 754 Karp, P.D., Billington, R., Caspi, R., Fulcher, C.A., Latendresse, M., Kothari, A., Keseler, I.M.,  
755 Krummenacker, M., Midford, P.E., Ong, Q., et al. (2019). The BioCyc collection of microbial genomes and  
756 metabolic pathways. *Brief. Bioinformatics* *20*, 1085–1093.
- 757 Keller, K.L., Bender, K.S., and Wall, J.D. (2009). Development of a markerless genetic exchange system  
758 for *Desulfovibrio vulgaris* Hildenborough and its use in generating a strain with increased transformation  
759 efficiency. *Appl. Environ. Microbiol.* *75*, 7682–7691.
- 760 Kip, N., and van Veen, J.A. (2015). The dual role of microbes in corrosion. *ISME J.* *9*, 542–551.
- 761 Kristoficova, I., Vilhena, C., Behr, S., and Jung, K. (2018). BtsT, a Novel and Specific Pyruvate/H<sup>+</sup>  
762 Symporter in *Escherichia coli*. *J. Bacteriol.* *200*.
- 763 Kuehl, J.V., Price, M.N., Ray, J., Wetmore, K.M., Esquivel, Z., Kazakov, A.E., Nguyen, M., Kuehn, R.,  
764 Davis, R.W., Hazen, T.C., et al. (2014). Functional genomics with a comprehensive library of transposon  
765 mutants for the sulfate-reducing bacterium *Desulfovibrio alaskensis* G20. *MBio* *5*, e01041-14.
- 766 Kushkevych, I., Cejnar, J., Treml, J., Dordević, D., Kollar, P., and Vítězová, M. (2020). Recent advances  
767 in metabolic pathways of sulfate reduction in intestinal bacteria. *Cells* *9*.
- 768 Langmead, B., and Salzberg, S.L. (2012). Fast gapped-read alignment with Bowtie 2. *Nat. Methods* *9*, 357–

- 769 359.
- 770 Larsen, R.A., Wilson, M.M., Guss, A.M., and Metcalf, W.W. (2002). Genetic analysis of pigment  
771 biosynthesis in *Xanthobacter autotrophicus* Py2 using a new, highly efficient transposon mutagenesis  
772 system that is functional in a wide variety of bacteria. *Arch. Microbiol.* *178*, 193–201.
- 773 Lin, S., and Cronan, J.E. (2011). Closing in on complete pathways of biotin biosynthesis. *Mol. Biosyst.* *7*,  
774 1811–1821.
- 775 Mehta-Kolte, M.G., Stoeva, M.K., Mehra, A., Redford, S.A., Youngblut, M.D., Zane, G., Grégoire, P.,  
776 Carlson, H.K., Wall, J., and Coates, J.D. (2019). Adaptation of *Desulfovibrio alaskensis* G20 to perchlorate,  
777 a specific inhibitor of sulfate reduction. *Environ. Microbiol.* *21*, 1395–1406.
- 778 Meyer, B., Kuehl, J.V., Price, M.N., Ray, J., Deutschbauer, A.M., Arkin, A.P., and Stahl, D.A. (2014). The  
779 energy-conserving electron transfer system used by *Desulfovibrio alaskensis* strain G20 during pyruvate  
780 fermentation involves reduction of endogenously formed fumarate and cytoplasmic and membrane-bound  
781 complexes, Hdr-Flox and Rnf. *Environ. Microbiol.* *16*, 3463–3486.
- 782 Mikheenko, I.P., Rousset, M., Dementin, S., and Macaskie, L.E. (2008). Bioaccumulation of palladium by  
783 *Desulfovibrio fructosivorans* wild-type and hydrogenase-deficient strains. *Appl. Environ. Microbiol.* *74*,  
784 6144–6146.
- 785 Muyzer, G., and Stams, A.J.M. (2008). The ecology and biotechnology of sulphate-reducing bacteria. *Nat.*  
786 *Rev. Microbiol.* *6*, 441–454.
- 787 Novichkov, P.S., Kazakov, A.E., Ravcheev, D.A., Leyn, S.A., Kovaleva, G.Y., Sutormin, R.A., Kazanov,  
788 M.D., Riehl, W., Arkin, A.P., Dubchak, I., et al. (2013). RegPrecise 3.0—a resource for genome-scale  
789 exploration of transcriptional regulation in bacteria. *BMC Genomics* *14*, 745.
- 790 van Opijnen, T., and Camilli, A. (2013). Transposon insertion sequencing: a new tool for systems-level  
791 analysis of microorganisms. *Nat. Rev. Microbiol.* *11*, 435–442.
- 792 van Opijnen, T., Bodi, K.L., and Camilli, A. (2009). Tn-seq: high-throughput parallel sequencing for fitness  
793 and genetic interaction studies in microorganisms. *Nat. Methods* *6*, 767–772.
- 794 Pan, S., Nikolakakis, K., Adamczyk, P.A., Pan, M., Ruby, E.G., and Reed, J.L. (2017). Model-enabled gene  
795 search (MEGS) allows fast and direct discovery of enzymatic and transport gene functions in the marine  
796 bacterium *Vibrio fischeri*. *J. Biol. Chem.* *292*, 10250–10261.
- 797 Peck, H.D. (1962). The role of adenosine-5'-phosphosulfate in the reduction of sulfate to sulfite by  
798 *Desulfovibrio desulfuricans*. *J. Biol. Chem.* *237*, 198–203.
- 799 Price, M.N., and Arkin, A.P. (2017). PaperBLAST: Text Mining Papers for Information about Homologs.



800 MSystems 2.

801 Price, M.N., Deutschbauer, A.M., Kuehl, J.V., Liu, H., Witkowska, H.E., and Arkin, A.P. (2011). Evidence-  
802 based annotation of transcripts and proteins in the sulfate-reducing bacterium *Desulfovibrio vulgaris*  
803 Hildenborough. *J. Bacteriol.* *193*, 5716–5727.

804 Price, M.N., Ray, J., Wetmore, K.M., Kuehl, J.V., Bauer, S., Deutschbauer, A.M., and Arkin, A.P. (2014).  
805 The genetic basis of energy conservation in the sulfate-reducing bacterium *Desulfovibrio alaskensis* G20.  
806 *Front. Microbiol.* *5*, 577.

807 Price, M.N., Wetmore, K.M., Waters, R.J., Callaghan, M., Ray, J., Liu, H., Kuehl, J.V., Melnyk, R.A.,  
808 Lamson, J.S., Suh, Y., et al. (2018). Mutant phenotypes for thousands of bacterial genes of unknown  
809 function. *Nature* *557*, 503–509.

810 Rajeev, L., Luning, E.G., Dehal, P.S., Price, M.N., Arkin, A.P., and Mukhopadhyay, A. (2011). Systematic  
811 mapping of two component response regulators to gene targets in a model sulfate reducing bacterium.  
812 *Genome Biol.* *12*, R99.

813 Rajeev, L., Garber, M.E., Zane, G.M., Price, M.N., Dubchak, I., Wall, J.D., Novichkov, P.S.,  
814 Mukhopadhyay, A., and Kazakov, A.E. (2018). A new family of transcriptional regulators of  
815 tungstoenzymes and molybdate/tungstate transport. *Environ. Microbiol.*

816 Rey, F.E., Gonzalez, M.D., Cheng, J., Wu, M., Ahern, P.P., and Gordon, J.I. (2013). Metabolic niche of a  
817 prominent sulfate-reducing human gut bacterium. *Proc Natl Acad Sci USA* *110*, 13582–13587.

818 Reznikoff, W.S. (2008). Transposon Tn5. *Annu. Rev. Genet.* *42*, 269–286.

819 Riederer-Henderson, M.A., and Wilson, P.W. (1970). Nitrogen fixation by sulphate-reducing bacteria. *J.*  
820 *Gen. Microbiol.* *61*, 27–31.

821 Rodionov, D.A., Dubchak, I., Arkin, A., Alm, E., and Gelfand, M.S. (2004). Reconstruction of regulatory  
822 and metabolic pathways in metal-reducing delta-proteobacteria. *Genome Biol.* *5*, R90.

823 Rubin, B.E., Wetmore, K.M., Price, M.N., Diamond, S., Shultzaberger, R.K., Lowe, L.C., Curtin, G., Arkin,  
824 A.P., Deutschbauer, A., and Golden, S.S. (2015). The essential gene set of a photosynthetic organism. *Proc*  
825 *Natl Acad Sci USA* *112*, E6634-43.

826 Rückert, C. (2016). Sulfate reduction in microorganisms-recent advances and biotechnological  
827 applications. *Curr. Opin. Microbiol.* *33*, 140–146.

828 Saier, M.H., Reddy, V.S., Tsu, B.V., Ahmed, M.S., Li, C., and Moreno-Hagelsieb, G. (2016). The  
829 Transporter Classification Database (TCDB): recent advances. *Nucleic Acids Res.* *44*, D372-9.



- 830 Shatsky, M., Allen, S., Gold, B.L., Liu, N.L., Juba, T.R., Reveco, S.A., Elias, D.A., Prathapam, R., He, J.,  
831 Yang, W., et al. (2016a). Bacterial interactomes: interacting protein partners share similar function and are  
832 validated in independent assays more frequently than previously reported. *Mol. Cell. Proteomics* *15*, 1539–  
833 1555.
- 834 Shatsky, M., Dong, M., Liu, H., Yang, L.L., Choi, M., Singer, M.E., Geller, J.T., Fisher, S.J., Hall, S.C.,  
835 Hazen, T.C., et al. (2016b). Quantitative Tagless Copurification: A Method to Validate and Identify Protein-  
836 Protein Interactions. *Mol. Cell. Proteomics* *15*, 2186–2202.
- 837 Smart, J.P., Cliff, M.J., and Kelly, D.J. (2009). A role for tungsten in the biology of *Campylobacter jejuni*:  
838 tungstate stimulates formate dehydrogenase activity and is transported via an ultra-high affinity ABC  
839 system distinct from the molybdate transporter. *Mol. Microbiol.* *74*, 742–757.
- 840 Smith, A.M., Heisler, L.E., Mellor, J., Kaper, F., Thompson, M.J., Chee, M., Roth, F.P., Giaever, G., and  
841 Nislow, C. (2009). Quantitative phenotyping via deep barcode sequencing. *Genome Res.* *19*, 1836–1842.
- 842 Stoeva, M.K., and Coates, J.D. (2019). Specific inhibitors of respiratory sulfate reduction: towards a  
843 mechanistic understanding. *Microbiology (Reading, Engl)* *165*, 254–269.
- 844 Thrasher, D.R., and Vance, I. (2005). Reservoir souring: mechanisms and prevention. In *Petroleum*  
845 *Microbiology*, B. Ollivier, and M. Magot, eds. (American Society of Microbiology), pp. 123–142.
- 846 Turkarslan, S., Raman, A.V., Thompson, A.W., Arens, C.E., Gillespie, M.A., von Netzer, F., Hillesland,  
847 K.L., Stolyar, S., López García de Lomana, A., Reiss, D.J., et al. (2017). Mechanism for microbial  
848 population collapse in a fluctuating resource environment. *Mol. Syst. Biol.* *13*, 919.
- 849 Vita, N., Valette, O., Brasseur, G., Lignon, S., Denis, Y., Ansaldi, M., Dolla, A., and Pieulle, L. (2015).  
850 The primary pathway for lactate oxidation in *Desulfovibrio vulgaris*. *Front. Microbiol.* *6*, 606.
- 851 Wetmore, K.M., Price, M.N., Waters, R.J., Lamson, J.S., He, J., Hoover, C.A., Blow, M.J., Bristow, J.,  
852 Butland, G., Arkin, A.P., et al. (2015). Rapid quantification of mutant fitness in diverse bacteria by  
853 sequencing randomly bar-coded transposons. *MBio* *6*, e00306-15.
- 854 Yong, P., Rowson, N.A., Farr, J.P.G., Harris, I.R., and Macaskie, L.E. (2002). Bioaccumulation of  
855 palladium by *Desulfovibrio desulfuricans*. *J. Chem. Technol. Biotechnol.* *77*, 593–601.
- 856 Zane, G.M., Yen, H.B., and Wall, J.D. (2010). Effect of the deletion of *qmoABC* and the promoter-distal  
857 gene encoding a hypothetical protein on sulfate reduction in *Desulfovibrio vulgaris* Hildenborough. *Appl.*  
858 *Environ. Microbiol.* *76*, 5500–5509.
- 859 Zhang, R., Ou, H.-Y., and Zhang, C.-T. (2004). DEG: a database of essential genes. *Nucleic Acids Res.* *32*,  
860 D271-2.
